# Supplementary material for: Proactive community case management and child survival: protocol for a cluster randomised controlled trial
Source: PubMed Central journal article supplement — BMJ Open. 2019 Aug 26;9(8):e027487. doi: 10.1136/bmjopen-2018-027487 (PMC6720240; doi:10.1136/bmjopen-2018-027487), 2019-08-26
Supplement: bmjopen-2018-027487.draft_revisions.pdf [file bmjopen-2018-027487.draft_revisions.pdf]

# BMJ Open

BMJ Open is committed to open peer review. As part of this commitment we make the peer review history of every article we publish publicly available.

When an article is published we post the peer reviewers' comments and the authors' responses online. We also post the versions of the paper that were used during peer review. These are the versions that the peer review comments apply to.

The versions of the paper that follow are the versions that were submitted during the peer review process. They are not the versions of record or the final published versions. They should not be cited or distributed as the published version of this manuscript.

BMJ Open is an open access journal and the full, final, typeset and author-corrected version of record of the manuscript is available on our site with no access controls, subscription charges or pay-per-view fees (<http://bmjopen.bmj.com>).

If you have any questions on BMJ Open's open peer review process please email [info.bmjopen@bmj.com](mailto:info.bmjopen@bmj.com)

# BMJ Open

## Proactive Community Case Management and Child Survival: Protocol for a Cluster Randomised Controlled Trial

|                               |                                                                                                                                                                                                                                                                                                                                                                                                                                                                                                                                                                                                                                                                                                                                  |
|-------------------------------|----------------------------------------------------------------------------------------------------------------------------------------------------------------------------------------------------------------------------------------------------------------------------------------------------------------------------------------------------------------------------------------------------------------------------------------------------------------------------------------------------------------------------------------------------------------------------------------------------------------------------------------------------------------------------------------------------------------------------------|
| Journal:                      | <i>BMJ Open</i>                                                                                                                                                                                                                                                                                                                                                                                                                                                                                                                                                                                                                                                                                                                  |
| Manuscript ID                 | bmjopen-2018-027487                                                                                                                                                                                                                                                                                                                                                                                                                                                                                                                                                                                                                                                                                                              |
| Article Type:                 | Protocol                                                                                                                                                                                                                                                                                                                                                                                                                                                                                                                                                                                                                                                                                                                         |
| Date Submitted by the Author: | 24-Oct-2018                                                                                                                                                                                                                                                                                                                                                                                                                                                                                                                                                                                                                                                                                                                      |
| Complete List of Authors:     | Whidden, Caroline; Muso, Research<br>Treleven, Emily; University of Michigan<br>Liu, Jenny; University of California, San Francisco, Department of Social and Behavioral Sciences<br>Padian, Nancy; University of California, Berkeley, School of Public Health<br>Poudiougou, Belco; Muso, Research<br>Bautista-Arredondo, Sergio; Instituto Nacional de Salud Publica<br>Fay, Michael; National Institutes of Allergy and Infectious Disease<br>Samaké, Salif; Malian Ministry of Health and Public Hygiene<br>Johnson, Ari; University of California San Francisco, ZSFG Division of Hospital Medicine<br>Kayentao, Kassoum; University of Sciences Techniques and Technologies of Bamako, Malaria Research & Training Centre |
| Keywords:                     | Child health, Maternal health, Cluster randomized trial, Community Health Workers, integrated Community Case Management, Child mortality                                                                                                                                                                                                                                                                                                                                                                                                                                                                                                                                                                                         |
|                               |                                                                                                                                                                                                                                                                                                                                                                                                                                                                                                                                                                                                                                                                                                                                  |

SCHOLARONE™  
Manuscripts

## Proactive Community Case Management and Child Survival: Protocol for a Cluster Randomised Controlled Trial

Caroline Whidden<sup>1</sup>, Emily Treleaven<sup>2</sup>, Jenny Liu<sup>3</sup>, Nancy Padian<sup>4</sup>, Belco Poudiougou<sup>1</sup>, Sergio Bautista-Arredondo<sup>4,5</sup>, Michael Fay<sup>6</sup>, Salif Samaké<sup>7</sup>, Ari Johnson<sup>1,8</sup>, Kassoum Kayentao<sup>1,9</sup>

<sup>1</sup> Muso, Bamako, Mali and San Francisco, CA, USA

<sup>2</sup> University of Michigan, 426 Thompson St., Ann Arbor, MI 48106, USA

<sup>3</sup> University of California, San Francisco, Institute for Health and Aging, Department of Social and Behavioral Sciences, 3333 California St Suite 340, University of California, San Francisco, San Francisco, CA 94118, USA

<sup>4</sup> University of California, Berkeley, School of Public Health, 50 University Hall, Berkeley, CA 94720-7360, USA

<sup>5</sup> Instituto Nacional de Salud Pública, Avenida Universidad 655, Santa María Ahuacatlán, 62100 Cuernavaca, Mor., Mexico

<sup>6</sup> National Institutes of Allergy and Infectious Disease, 5601 Fishers Lane, MSC 9806, Bethesda, MD 20892-9806, Unites States of America

<sup>7</sup> Malian Ministry of Health and Public Hygiene, BP.233, Bamako, Mali

<sup>8</sup> University of California, San Francisco School of Medicine, Box 1364, San Francisco, CA 94143-1364, USA

<sup>9</sup> Malaria Research & Training Center, University of Sciences Techniques and Technologies of Bamako, Mali

Corresponding Author:

Caroline E Whidden

Muso

SEMA, Route de 501 Lodgements

Bamako, Mali.

Email: [cwhidden@musohealth.org](mailto:cwhidden@musohealth.org)

**Word count: 3858**

## ABSTRACT

**Background:** The majority of maternal and child deaths in low- and middle-income countries are preventable with existing community-based interventions. Investing in community health workers (CHWs)—shown to improve access to care and reduce maternal, newborn, and child morbidity and mortality—is re-emerging as a key strategy to achieve health-related Sustainable Development Goals. However, recent evaluations of national programmes for CHW-led integrated Community Case Management (iCCM) of common childhood illnesses have not found benefits on access to care and child mortality. Developing innovative ways to maximise the potential benefits of iCCM is critical to achieving the SDGs.

**Methods:** A cluster-randomised controlled trial in rural Mali aims to test the efficacy of a proactive community case management (ProCCM) intervention in reducing under-five mortality, compared to a conventional iCCM approach. In the ProCCM arm, 69 village-clusters will have CHWs who conduct daily proactive case-finding home visits and deliver doorstep counsel, care, referral, and follow-up. In the iCCM arm, 68 village-clusters will have CHWs who provide the same services exclusively out of a fixed health post. A baseline population census will be conducted of all people living in the study area. All women of child-bearing age will be enrolled in the study and surveyed at baseline, 12, 24, and 36 months. The survey includes a life table tracking all live births

1  
2  
3 and deaths occurring in the 59 months prior to enrolment through the 36 months of  
4  
5 follow-up.  
6

7  
8 **Discussion:** This study is designed and implemented in partnership with the Malian  
9  
10 Ministry of Health. We aim to answer questions of key concern among government  
11  
12 partners in the design of the national-level iCCM program, including if ProCCM is cost-  
13  
14 effective, equitable, and affordable at scale. Findings from this study could have  
15  
16 important policy implications for CHW-led iCCM scale up across sub-Saharan Africa.  
17  
18

19  
20  
21 **Trial registration:** ClinicalTrials.gov, NCT02694055. Registered 13 January 2016,  
22  
23 <https://clinicaltrials.gov/show/NCT02694055>.  
24  
25

26  
27  
28 **Key words:** Child health; Maternal health; Cluster randomized trial; Community Health  
29  
30 Workers, integrated Community Case Management, Child mortality  
31  
32

### 33 34 35 **Strengths and limitations of this study** 36

- 37 • This is a cluster randomised controlled trial powered to detect a 25% difference in  
38 the incidence rate of under-five mortality between the two study arms.  
39
- 40 • The trial will generate evidence on the efficacy, cost-effectiveness, and equity of  
41 community-based proactive case detection on access to care and child mortality.  
42
- 43 • The intervention is designed to facilitate public sector adoption and scale-up if  
44 found to be effective.  
45
- 46 • Unexpected events may occur that influence the extent to which the intervention  
47 can be implemented per protocol.  
48  
49  
50  
51  
52  
53  
54  
55  
56  
57  
58  
59  
60

## BACKGROUND

The vast majority of maternal, newborn, and child deaths in low- and middle-income countries are preventable. Evidence-based and cost-effective methods for prevention and treatment are available for the leading causes of death, yet many still face barriers to obtaining timely, quality, appropriate care. If community-based interventions, such as the treatment of malaria with artemisinin compounds, oral rehydration solution for childhood diarrhoea, oral antibiotics for pneumonia, nutritional interventions during pregnancy, and hand washing with soap, were scaled to achieve 90% coverage in high-burden countries before 2020, an estimated 6.9 million maternal and child deaths could be averted.[1]

Integrated Community Case Management (iCCM) of common childhood illnesses entails a package of services to diagnose, treat and refer children under five with malaria, diarrhoea, pneumonia, or moderate malnutrition, delivered by community health workers (CHWs).[2] Community case management of common childhood illnesses has been shown to increase care seeking outside the home,[3] reduce treatment failure rates,[3] and reduce mortality due to malaria,[4] diarrhoea,[3,5,6] pneumonia,[3,7,8] as well as all causes.[4,6,7]

Many countries in sub-Saharan Africa have adopted iCCM as an evidence-based strategy to improve child health.[9] However, the expected benefits of iCCM have not been realized in all contexts.[10–12] Several recent evaluations of national iCCM programmes did not find impacts on care seeking or child mortality, in part, study authors conclude, due to low demand for CHW services.[13–16] These national programmes shared certain

1  
2  
3 design and implementation features that may have contributed to the lack of overall  
4 effects by not addressing barriers to care, such as user fees for services, lack of frequent  
5 and dedicated CHW supervision for quality assurance, and community care provision  
6 exclusively (or primarily) for patients that seek care from a fixed health post. As more  
7 countries commit to scaling up CHW-led health care systems, it is critical that we  
8 understand how to best design and implement iCCM, and CHW services more broadly, in  
9 order to bring about their full potential.  
10  
11  
12  
13  
14  
15  
16  
17  
18  
19  
20

21 To address this need, we designed a cluster randomised controlled trial to test a proactive  
22 model of CHW service delivery for comprehensive child, reproductive, and maternal  
23 health services (ProCCM) compared to the same set of comprehensive services delivered  
24 via the standard iCCM model relying on patient-initiated care-seeking.[17] The ProCCM  
25 approach is designed to overcome additional social, structural, and health system barriers  
26 that may impede or lead to delayed access, even under a community-based  
27 comprehensive iCCM approach. At a systems level, these include the direct and indirect  
28 costs of care, including distance to care. At the household level, lack of resources,  
29 mistrust in the health care system, and complex familial decision-making dynamics due  
30 to in part to gender inequality can contribute to delays in reaching care.[18,19] By  
31 proactively seeking out patients and linking community members to the health care  
32 system, ProCCM is designed to reduce the time from onset of condition to utilisation of  
33 health services, including direct provision of comprehensive primary care services for all  
34 household members, ultimately reducing mortality.  
35  
36  
37  
38  
39  
40  
41  
42  
43  
44  
45  
46  
47  
48  
49  
50  
51  
52

## 53 54 55 **METHODS**

## Study aims and hypothesis

Our cluster randomised controlled trial aims to:

- (1) Estimate the effect of adding proactive case detection by CHWs to an iCCM intervention on under-five child mortality; we hypothesize that, after 36 months, the difference in the incidence rate of under-five mortality between the two study arms will be greater than 25%.
- (2) Compared to iCCM, estimate the effect of ProCCM on utilisation of reproductive, maternal, and child health services.
- (3) Evaluate the ProCCM model, compared to iCCM, in terms of cost-effectiveness, equity, and affordability at scale.

## Study site

The trial will be conducted in the Bankass health district in eastern Mali, approximately 600 kilometres east of the nation's capital, Bamako. The district has a 2016 population of approximately 300,000 people and is served by a public secondary referral hospital located in Bankass, the largest town in the district.[20] Within the Bankass health district, the study is being conducted in seven (of 22) health catchment areas: Dimbal, Doundé, Ende, Kani Bozon, Koulongon, Lessagou, and Soubala (Figure 1). The study area has a 2016 population of approximately 100,000 people.[20] Each health catchment area is served by a primary health centre (PHC) operated by the Ministry of Health.

## Study design

This is an unblinded, cluster-randomised controlled trial, with 69 village-clusters in the intervention arm and 68 village-clusters in the comparison arm. Clusters are randomised



1  
2  
3 to receive either iCCM from stationary CHW(s) serving patients exclusively at a  
4  
5 community health post (control) as per Mali's national iCCM strategy,[49] or ProCCM  
6  
7 from CHW(s) conducting daily proactive case-finding home visits in addition to serving  
8  
9 patients at a community health post. Only the intervention arm will receive door-to-door  
10  
11 proactive case detection by CHWs, including doorstep care and home-based follow-up.  
12  
13

### 14 15 **Intervention**

16  
17 Local community members—female candidates encouraged—who can read and write in  
18  
19 French will be recruited, trained, supervised, and supported as CHWs from the village-  
20  
21 cluster in which they will work. CHW coverage will be based on Mali's national iCCM  
22  
23 strategy, which recommends one CHW for a population of 700 in the southern region,  
24  
25 which includes the study area.[49] Clusters, therefore, may have one or multiple CHWs,  
26  
27 depending on the size of the cluster population. Clusters with less than 200 people and  
28  
29 within three kilometres of another cluster assigned to the same study arm will share a  
30  
31 CHW, provided there is no geographic barrier (i.e., river) between the two clusters and no  
32  
33 linguistic barrier for the CHW. CHWs will provide a comprehensive set of primary care  
34  
35 services, including iCCM in accordance with national and international standards[21] and  
36  
37 reproductive health for women of child-bearing age (see Table 1 for a full description of  
38  
39 the CHW package of care). CHW services will include counselling, diagnostics,  
40  
41 treatment, referral to reinforced PHCs, and follow-up care. User fees will be removed for  
42  
43 all CHW and referral services for all patients in the study area. CHWs in both arms will  
44  
45 receive a salary circa minimum wage and will be required to be on call, available to  
46  
47 receive and care for patients who seek them out, 24 hours per day, seven days per week.  
48  
49  
50  
51  
52  
53  
54  
55  
56  
57  
58  
59  
60

1  
2  
3 A detailed description of the entire health system strengthening intervention in both arms  
4 is provided in the Online Supplementary Document.  
5  
6

7  
8  
9 *Control arm: Conventional CHW service delivery*

10  
11 In clusters assigned to the control arm, CHWs will be stationed at a community health  
12 post to provide the comprehensive package of primary care services for at least four  
13 hours per day, six days per week, available to receive patients seeking care.  
14  
15

16  
17  
18  
19 *Intervention arm: Proactive CHW service delivery*

20  
21 In clusters assigned to the intervention arm, CHW(s) will be trained and deployed to  
22 conduct proactive case finding, door-to-door home visits for at least two hours each day,  
23 six days a week, with the goal of visiting each household at least two times each month.  
24  
25 During the home visit, CHWs will screen all household members for recent illness or  
26 symptoms and provide services at the home, including follow-up for sick children and  
27 adults, pregnant women, newborns, and post-partum mothers. In addition to home visits,  
28 ProCCM CHWs will provide care at their health post for at least two hours a day, six  
29 days per week, according to a calendar shared with the community. At the health post,  
30 CHWs will provide the same services as those offered by CHWs in the control arm to  
31 care-seeking patients.  
32  
33  
34  
35  
36  
37  
38  
39  
40  
41  
42  
43  
44

45 **Cluster definition and randomisation**

46  
47 In order to identify distinct clusters, a field team visited all villages and hamlets in the  
48 study area and collected GPS coordinates at the public space where community-wide  
49 meetings, announcements, and festivities are held. GPS coordinates were mapped and the  
50 cardinal distances between neighbouring villages/hamlets were calculated. Villages and  
51  
52  
53  
54  
55  
56  
57  
58  
59  
60

1  
2  
3 hamlets one kilometre or less from one another were grouped into clusters, resulting in  
4  
5 160 individual villages and hamlets grouped into 137 unique clusters.  
6  
7

8  
9  
10 Villages located 1.0 or more kilometres from a PHC were stratified by health catchment  
11  
12 area and distance to the nearest PHC (1.0–5.0 kilometres vs. more than 5.0 kilometres).  
13

14 The cut-off point of 5.0 km was defined in accordance with national iCCM  
15  
16 guidelines,[22] which deploys CHWs to deliver iCCM services only in communities  
17  
18 greater than 5.0 km from a PHC. An additional stratum was defined for all villages where  
19  
20 the PHC was located to ensure balanced assignment of PHC villages across arms. Within  
21  
22 each strata, villages were randomly assigned to the control or treatment arm using a  
23  
24 computer-generated random number conducted a member of the US-based research team  
25  
26 who did not have any involvement in the implementation of the intervention or field  
27  
28 operations.  
29  
30  
31

### 32 33 34 **Sample size and primary and secondary endpoints**

#### 35 36 *Primary endpoint*

37  
38 The primary endpoint is under-five mortality, measured as deaths among children under  
39  
40 five years of age per 1,000 person-years at risk of mortality. The sample size for the trial  
41  
42 was based on this primary endpoint, derived using methods for cluster-randomised  
43  
44 trials[23] in which each cluster was treated as an observation and the cluster-level  
45  
46 outcome was defined as the under-five mortality rate per person-years at risk. We used a  
47  
48 negative binomial model to simulate the number of deaths among children under five.  
49  
50

51  
52 According to 2014 national population estimates adjusted for 2016 using a 2.2% annual  
53  
54 growth rate,[20] the seven health catchment areas encompassed a population of 103,848  
55  
56  
57  
58

1  
2  
3 inhabitants. Assuming that 20% (n=20,767) of the population was children aged 0-59  
4 months, we calculated a mean of 216 children per village. Person-years at risk were  
5  
6 calculated assuming three years of prospective study follow-up with 10% attrition based  
7  
8 on experience with previous trials in Mali.[24,25] We used a coefficient of variation of  
9  
10  $k=0.29$ [23] to model the extra variation due to clustering ( $1/k^2$  is the size parameter in the  
11  
12 negative binomial model). With these parameters, the trial will be able to detect a relative  
13  
14 difference of 25% ( $\alpha = 0.05$ , two-tailed test) in the under-five mortality incidence  
15  
16 between treatment and control arms with 81.8% power after 36 months.  
17  
18  
19  
20  
21

### 22 *Secondary endpoints*

23 We will also estimate the effect of the intervention on a number of secondary endpoints:  
24

- 25 (a) Infant mortality (deaths per 1,000 live births among children aged 0-11 months);
- 26 (b) Newborn mortality (deaths per 1,000 live births among children aged 0-28 days);
- 27 (c) Receipt of oral rehydration therapy and zinc within 24 hours of diarrhea onset among  
28 children under five;
- 29 (d) Receipt of diagnostic testing and/or effective treatment for malaria within 24 hours of  
30 fever onset among children under five;
- 31 (e) Evaluation by a qualified provider within 24 hours of symptom onset among children  
32 under five with cough and/or fast breathing;
- 33 (f) Receipt of three or more doses of Sulfadoxine-Pyrimethamine as Intermittent  
34 Preventive Treatment during a woman's most recent pregnancy;
- 35 (g) Enrollment in ANC with a skilled provider in the first trimester during a woman's  
36 most recent pregnancy;
- 37  
38  
39  
40  
41  
42  
43  
44  
45  
46  
47  
48  
49  
50  
51  
52  
53  
54  
55  
56  
57  
58  
59  
60

1  
2  
3 (h) Completing four or more antenatal care (ANC) consultations with a skilled provider  
4  
5 during a woman's most recent pregnancy;

6  
7  
8 (i) Use of a modern method of contraception among women of reproductive age.  
9

### 10 11 **Inclusion criteria**

12  
13 Any individual in the study area at any point during the study period, including visitors,  
14  
15 are eligible to receive the health services offered through the intervention. Only  
16  
17 permanent residents of the study area are eligible to be included in the household survey.  
18  
19

### 20 21 **Sources of data**

22  
23 The effects of the ProCCM model of service delivery, compared to the iCCM model, for  
24  
25 the primary and secondary endpoints will be assessed using data from three sources: (1)  
26  
27 household surveys, (2) the CHW mobile application, and (3) facility records.  
28  
29

### 30 31 *Household surveys*

32  
33 A household survey will be administered to all eligible women at baseline (prior to the  
34  
35 launch of the intervention), and 12, 24, and 36 months after the intervention. Surveyors  
36  
37 will not be members of the villages they survey, nor will they be members of the  
38  
39 intervention health care delivery staff. All surveyors will be female, as the survey tool  
40  
41 contains sensitive questions regarding contraception and reproductive health. The survey  
42  
43 includes a household roster, which may be completed by the female head of household,  
44  
45 and a questionnaire administered to consenting or assenting women of reproductive age  
46  
47 (15-49) who are permanently residing in the household without foreseeable plans to move  
48  
49 away from the area.  
50  
51  
52  
53  
54  
55  
56  
57  
58  
59  
60

1  
2  
3 The household survey instrument was adapted from the Mali Demographic and Health  
4 Survey. The baseline survey will include a birth history to capture all live births  
5 occurring in the 59 months prior, which will then be updated during each of the follow-up  
6 survey rounds. To track maternal mortality, the survey will record all household deaths  
7 occurring the previous year, with additional information on timing of death (during  
8 pregnancy, childbirth, after childbirth) for women of reproductive age. The survey also  
9 captures detailed information on household and individual socio-demographic  
10 characteristics, access and utilisation of reproductive and maternal health care, and care-  
11 seeking behaviours and investments for recently ill children under five. Follow-up  
12 surveys will add new household members to the study cohort (e.g., due to births,  
13 migration) and record absences due to out-migration or death. Surveyors will attempt to  
14 contact each eligible woman up to three additional times if she is absent at the first visit.

### 31 *CHW mobile application data*

32  
33  
34 CHWs in both study arms will be equipped with an Android smartphone and trained to  
35 use a mobile application to track services rendered. The app is also designed to be a job  
36 aid with integrated data validation and prompts to guide the CHW through the  
37 appropriate case management protocol. Population census data collected at baseline,  
38 including individual unique identifiers and demographic information, will be pre-  
39 populated into the CHW application so that each CHW can access the records of families  
40 in his/her service delivery zone. During each encounter with a prospective patient, the  
41 CHW will either identify the individual in the application or register newborns, new  
42 arrivals, or visitors, before selecting the appropriate form in the application for the  
43 specific health concern (e.g., malaria case management). The types of actions displayed  
44  
45  
46  
47  
48  
49  
50  
51  
52  
53  
54  
55  
56  
57  
58  
59  
60

1  
2  
3 under a patient's profile are linked to her sex and age (e.g., pregnancy follow-up is  
4 displayed only for women aged 15-49). The application will also alert the CHW of  
5  
6 upcoming tasks related to patient follow-up, with an action calendar for 24-hour follow-  
7  
8 up available starting at midnight each day.  
9  
10

### 11 12 13 *Facility data*

14  
15 Each PHC will be equipped with five laptop computers, and the physician-in-chief,  
16  
17 midwife, pharmacist, vaccine administration technician, and receptionist will be trained  
18  
19 in data collection on an EMR system. Population census data collected at baseline will be  
20  
21 imported into the EMR system, including individual unique identifiers and basic  
22  
23 demographic information. When attending a PHC, patients will present first to reception,  
24  
25 where their medical records will be identified using their unique identifier, name, family  
26  
27 and/or village information. During the patient consultation, the service provider will  
28  
29 record patient health information (i.e., diagnostic tests, results, treatment, posology) in  
30  
31 both the EMR and in the paper facility registers, the source documents of the Malian  
32  
33 Ministry of Health and required by law. Referral by a CHW will be recorded.  
34  
35  
36  
37  
38  
39

### 40 **Analytical plan**

41  
42 Analyses of the primary and secondary endpoints will estimate intention-to-treat (ITT)  
43  
44 effects. Using data collected prospectively in the 12-, 24- and 36-month follow-up  
45  
46 surveys, we will test for the difference in the incidence of deaths among children under  
47  
48 five across treatment and control clusters using a Poisson regression model. Children  
49  
50 surveyed at baseline will contribute person-years of exposure from the start date of the  
51  
52 trial (intervention launch). Children born during the trial will contribute person-years of  
53  
54 exposure beginning at birth. All children included in the analysis will contribute person-  
55  
56  
57  
58  
59  
60

1  
2  
3 years through the date of their death, or are right-censored on their fifth birthday or the  
4  
5 end date of the trial, whichever comes first. The coefficient of interest will be the  
6  
7 incidence rate ratio estimated on a dichotomous variable that indicates the child's  
8  
9 residence in a treatment versus control cluster. We will control for the non-constant risk  
10  
11 of mortality in early childhood by adding a term for age, measured in months.  
12  
13

14  
15 ITT estimates for secondary endpoints will also be estimated via regression analyses  
16  
17 testing the significance of the coefficient on the treatment assignment variable. Linking  
18  
19 functions will be chosen based on the type of outcome variable analysed (i.e., logit for  
20  
21 dichotomous outcomes). Given the number of secondary endpoints, we will correct for  
22  
23 multiple hypothesis testing. To control the familywise error rate, we will implement a  
24  
25 Bonferroni correction. We will identify the number of tests to be conducted ( $k$ ) *a priori*.  
26  
27 Using  $\alpha=0.05$ , we will calculate a corrected  $\alpha=(0.05/k)$  to be used in all significance tests  
28  
29 for secondary endpoints.  
30  
31  
32  
33

34  
35 All regressions will be estimated using robust standard errors to account for serial  
36  
37 correlation within clusters. We will also estimate ITT effects using an adjusted model that  
38  
39 controls for any unbalanced observable characteristics measured at baseline, such as  
40  
41 household wealth, education, or household size, among others. These will then be  
42  
43 compared to estimates from a per-protocol analysis of the primary and secondary  
44  
45 outcomes. Supplementary analyses will be conducted to assess the existence and  
46  
47 magnitude of heterogeneous treatment effects according to distance to PHC (less than five  
48  
49 kilometres vs. five kilometres or more), village population size, household wealth.  
50  
51  
52

53  
54  
55 *Cost-effectiveness analysis*  
56  
57  
58  
59



1  
2  
3 Cost-effectiveness analysis (CEA) compares different programme alternatives in terms of  
4 their cost-effectiveness ratio, which can be thought of as the average cost per unit of  
5 impact or benefit (e.g., cost per life year saved). In most cases, CEA is used to determine  
6 whether or not a new alternative policy is better than the status quo, or whether the extra  
7 cost is worth the extra benefit. In such cases, the incremental cost-effectiveness ratio  
8 (ICER) is used, which takes the ratio between the incremental costs of the new  
9 programme with respect to the status quo, to the incremental benefits of the new  
10 programme with respect to the status quo. We will perform an ICER analysis to evaluate  
11 the relative cost-effectiveness of the ProCCM model with respect of the iCCM model.  
12  
13

14  
15 We will calculate the total economic costs of both programmatic models, which will  
16 reflect the monetary value of programme and household resources used to deliver and  
17 access services, respectively. From the programme perspective, these will include  
18 personnel and other recurrent costs such as drugs, laboratory tests and other inputs used  
19 to provide services. These data will come from three sources: (1) the CHW mobile  
20 application, which reflects all services and supplies used by CHWs for service provision;  
21 (2) PHC EMR, which include the services rendered at the PHC and resources will be  
22 valued at prices paid by the Ministry of Health; (3) programme records, including CHW's  
23 value of work time vis-à-vis salaries, and productivity data from the mobile application  
24 for time and services given. From the household perspective, costs include time used to  
25 access health services, valued at their opportunity costs (i.e., time lost from work), as  
26 well as out-of-pocket expenses such as paying for drugs or health services. These data  
27 will be obtained from the household surveys, which asks about out-of-pocket  
28 expenditures, time spent accessing services, and earnings from paid work.  
29  
30  
31  
32  
33  
34  
35  
36  
37  
38  
39  
40  
41  
42  
43  
44  
45  
46  
47  
48  
49  
50  
51  
52  
53  
54  
55  
56  
57  
58  
59  
60

### **Patient and public involvement**

The study was designed in collaboration with national, district, and local health officials. Bankass health district was chosen in consultation with the Ministry of Health for three reasons: (i) health care utilisation (prenatal and curative consultations) was low and under-five mortality was high; (ii) there were no overlapping interventions by other nongovernmental organizations at the time and for intended period of the trial; and (iii) local authorities were highly engaged and interested in collaborating on study implementation. Research questions and outcome measures were also chosen in consultation, to answer questions of key concern to ministerial partners for informing the design of the national strategic plan for iCCM scale-up, including whether the intervention is equitable, cost-effective, affordable at scale. Community consultation and permission will be sought prior to trial commencement in meetings with representatives of the village-clusters, such as village chiefs and their advisories, politico-administrative authorities, religious leaders, and representatives of women's and youth associations. Representatives will then communicate with community members via open public meetings. Once the study has terminated, results will be disseminated to participants via dissemination workshops at all levels of local, regional, and national representation.

### **Ethical approval and trial oversight**

This trial is registered with ClinicalTrials.gov (NCT02694055). Ethical approval was obtained from the Ethics Committee of the Faculty of Medicine, Pharmacy and Dentistry, University of Bamako (2016/03/CE/FMPOS). The University of California, San Francisco exempted secondary analysis of the trial data from ethical approval. A data safety and monitoring board (DSMB) will provide oversight throughout the trial.

## DISCUSSION

Supported by the emergence of global health guidelines and the accumulation of rigorous evidence on the efficacy of iCCM, countries across sub-Saharan Africa are scaling up iCCM to improve child health.[9] Yet, the most recent evaluations of national iCCM programmes suggest further improvements in the delivery of iCCM programmes are necessary to reduce under-five mortality.[13–16] Because the core design and implementation of CHW services varies across health systems, their optimal features must be identified and evaluated for iCCM to realise its full potential. This includes identifying how financing mechanisms, health system integration, packages and delivery of care, and CHW recruitment, training and supervision, and compensation relate to care outcomes where CHWs are deployed as frontline health workers. The current trial aims to address one of these gaps by testing a proactive case detection workflow against a passive approach on reducing under-five mortality risk. The results of the trial will thus be pertinent to policymakers and implementers to determine how CHWs may be better deployed for amplifying public health impact.

The current study was designed and will be implemented in partnership with the Mali Ministry of Health to facilitate adoption of lessons learned and scale-up in the public sector if the intervention is found to be effective. In addition to the primary objective related to CHW service delivery mechanisms, secondary objectives explore questions of key concern to ministerial partners for informing the design of the national strategic plan for iCCM scale-up, including whether the intervention is equitable, cost-effective, affordable at scale. The intervention itself is designed to be scalable as the planning and

1  
2  
3 implementation of the intervention was executed in partnership with the Ministry of  
4  
5 Health and district health officials, including operating through government PHCs.  
6  
7

### 8 9 **Limitations**

10  
11 The large geographic area and three-year time frame leaves the study open to a number of  
12  
13 potential confounding effects. Although contingency measures have been put into place  
14  
15 for various situations that may arise, unexpected events may occur that influence the  
16  
17 extent to which the study can be implemented per protocol. CHWs may have avenues for  
18  
19 interacting with each other outside the structures of the intervention which may lead to  
20  
21 contamination. Changes to the health system or other contextual factors in the  
22  
23 intervention area, such as drug stock-outs, health centre staff strikes, and concurrent  
24  
25 programme implementation by other actors, may be beyond the control of the study  
26  
27 implementers. However, close partnership with national and local health authorities  
28  
29 during study preparation will enable us to proactively track these events, implement  
30  
31 contingency steps, and/or otherwise document them for later sensitivity analyses of the  
32  
33 trial's effects.  
34  
35  
36  
37  
38  
39

### 40 41 **Trial status**

42 The household baseline survey was carried out from December 2016 to February 2017.  
43  
44 Health facility improvements, CHW trainings, and provider trainings were completed by  
45  
46 December 2016. Implementation of the intervention including the removal of user fees  
47  
48 began in February 2017.  
49  
50  
51  
52  
53  
54  
55  
56  
57  
58  
59  
60

## DECLARATIONS

### List of abbreviations

|              |                                          |
|--------------|------------------------------------------|
| CEA .....    | Cost-Effectiveness Analysis              |
| CHW .....    | Community Health Worker                  |
| DHS .....    | Demographic Health Survey                |
| DSMB .....   | Data Safety and Monitoring Board         |
| EMR .....    | Electronic Medical Records               |
| iCCM .....   | Integrated Community Case Management     |
| ICER .....   | Incremental Cost-Effectiveness Ratio     |
| ITT .....    | Intention to Treat                       |
| PHC .....    | Primary Health Centre                    |
| ProCCM ..... | Proactive Community Case Management      |
| UNICEF ..... | United Nations Children's Emergency Fund |
| WHO .....    | World Health Organization                |

### Ethics approval and consent to participate

This trial is registered with ClinicalTrials.gov (NCT02694055). Ethical approval was obtained from the Ethics Committee of the Faculty of Medicine, Pharmacy and Dentistry, University of Bamako (2016/03/CE/FMPOS). The University of California, San Francisco exempted secondary analysis of the trial data from ethical approval. Informed consent will be obtained from all participants entered into the trial, or from the participant's parent or guardian if she is a minor.

### **Consent for publication**

Not applicable.

### **Data sharing statement**

No additional data available now. Data will be made publicly available after the conclusion of the trial.

### **Competing interests**

CW, KK, and AJ declare grants from Child Relief International Foundation. KK and AJ declare grants from USAID Development Innovation Ventures. The funders had no role in study design, and will have no role in data collection, data analysis, data interpretation, or writing of future reports. All authors declare no other competing interests.

### **Funding**

The trial is funded by Muso, with resources received through unrestricted funding as well as dedicated research funding from Child Relief International Foundation and Johnson & Johnson Foundation.

### **Authors' contributions**

CW, KK, BP, JXL, ET, and AJ drafted the original study protocol with input from SS, NP, SB, and MF. MF conducted the sample size calculations. CW and ET prepared the protocol manuscript. All authors reviewed and provided feedback on the final version of the manuscript.

**Acknowledgements:**

We are grateful to Djoumé Diakité, Youssouf Keita, Yacouba Samaké, Amadou B Cissé, Aminata Konipo, and Seydou Sidibé of Muso for their role in implementing the intervention and assuring adherence to protocol. We thank Dr. Dansiné Diarra for the GPS mapping that allowed us to generate our clusters, and for providing Figure 1.

## Tables and Figures

Figure 1: Map of study area; colours indicate the seven health catchment areas within which the trial is being conducted

Table 1: CHW package of care, provided at the patient's doorstep (ProCCM arm) or at the CHW's health post (ProCCM and iCCM arms)

| CHW Intervention                                            | Description                                                                                                                                                                                                                                                                                                                                                                                                                                                                                                 |
|-------------------------------------------------------------|-------------------------------------------------------------------------------------------------------------------------------------------------------------------------------------------------------------------------------------------------------------------------------------------------------------------------------------------------------------------------------------------------------------------------------------------------------------------------------------------------------------|
| Diagnosis and treatment of malaria, all ages                | - Diagnosis and treatment of simple cases of malaria for patients of all ages, and accompaniment of patients of all ages with severe malaria to public PHC                                                                                                                                                                                                                                                                                                                                                  |
| iCCM of common childhood illnesses                          | - Diagnosis and treatment of malaria, diarrhoeal disease, and acute respiratory infection for children 2-59 months, and acute moderate malnutrition for children 6 to 59 months according to standard iCCM protocols[21]                                                                                                                                                                                                                                                                                    |
| Detection of pregnancy                                      | - Pregnancy testing for women whose last menstrual period occurred more than six weeks before the date of the visit                                                                                                                                                                                                                                                                                                                                                                                         |
| Family planning services                                    | - Contraceptive counselling, administration (oral contraceptives, depo provera, condoms), or referral (IUD, implants, sterilisation) for women who test negative for pregnancy and women or men who request family planning                                                                                                                                                                                                                                                                                 |
| Accompaniment or referral to PHC for danger signs, all ages | - Screening of sick patients of all ages for a list of predefined danger signs that indicate either immediate accompaniment or referral to public PHC<br>- Referral of pregnant women to public PHC for prenatal consultation, facility-based delivery, and post-natal care                                                                                                                                                                                                                                 |
| Follow-up care                                              | - 24 hour follow-up for patients of all ages after referral to public PHC<br>- 24, 48 and 72 hour follow-up after treatment of malaria (all ages) or iCCM (children under five); additional follow-up according to standard iCCM protocols[21]<br>- Follow-up and danger sign monitoring throughout pregnancy (two weeks throughout her pregnancy, and every week in the final month until delivery) and post-partum period (24 hours, 48 hours, five days, and once per week until 48 days after delivery) |
| Newborn assessment                                          | - Conduct of newborn assessment to provide counselling and screen for danger signs at 24 hours, 48 hours, 120 hours, 7 days, 14 days, 21 days, and 28 days                                                                                                                                                                                                                                                                                                                                                  |
| Health promotion and disease prevention                     | - Counselling for patients and families for disease prevention using behaviour change communication techniques                                                                                                                                                                                                                                                                                                                                                                                              |



## REFERENCES

- 1 Chou VB, Friberg IK, Christian M, *et al.* Expanding the population coverage of evidence-based interventions with community health workers to save the lives of mothers and children: an analysis of potential global impact using the Lives Saved Tool (LiST). *J Glob Health*;7. doi:10.7189/jogh.07.020401
- 2 Young M, Wolfheim C, Marsh DR, *et al.* World Health Organization/United Nations Children's Fund joint statement on integrated community case management: an equity-focused strategy to improve access to essential treatment services for children. *Am J Trop Med Hyg* 2012;**87**:6–10. doi:10.4269/ajtmh.2012.12-0221
- 3 Das JK, Lassi ZS, Salam RA, *et al.* Effect of community based interventions on childhood diarrhea and pneumonia: uptake of treatment modalities and impact on mortality. *BMC Public Health* 2013;**13**:S29. doi:10.1186/1471-2458-13-S3-S29
- 4 Kidane G, Morrow RH. Teaching mothers to provide home treatment of malaria in Tigray, Ethiopia: a randomised trial. *Lancet (London, England)* 2000;**356**:550–5. doi:10.1016/S0140-6736(00)02580-0
- 5 Munos MK, Walker CLF, Black RE. The effect of oral rehydration solution and recommended home fluids on diarrhoea mortality. *Int J Epidemiol* 2010;**39 Suppl 1**:i75-87. doi:10.1093/ije/dyq025
- 6 Walker CLF, Black RE. Zinc for the treatment of diarrhoea: effect on diarrhoea morbidity, mortality and incidence of future episodes. *Int J Epidemiol* 2010;**39 Suppl 1**:i63-9. doi:10.1093/ije/dyq023
- 7 Sazawal S, Black RE. Effect of pneumonia case management on mortality in neonates, infants, and preschool children: a meta-analysis of community-based trials. *Lancet Infect Dis* 2003;**3**:547–56. <http://www.ncbi.nlm.nih.gov/pubmed/12954560> (accessed 8 Mar 2016).
- 8 Theodoratou E, Al-Jilaihawi S, Woodward F, *et al.* The effect of case management on childhood pneumonia mortality in developing countries. *Int J Epidemiol* 2010;**39 Suppl 1**:i155-71. doi:10.1093/ije/dyq032
- 9 Rasanathan K, Muñiz M, Bakshi S, *et al.* Community case management of childhood illness in sub-Saharan Africa - findings from a cross-sectional survey on policy and implementation. *J Glob Health* 2014;**4**:020401. doi:10.7189/jogh.04.020401
- 10 Druetz T, Siekmans K, Goossens S, *et al.* The community case management of pneumonia in Africa: a review of the evidence. *Health Policy Plan* 2015;**30**:253–66. doi:10.1093/heapol/czt104
- 11 Rutebemberwa E, Kadobera D, Katureebe S, *et al.* Use of community health workers for management of malaria and pneumonia in urban and rural areas in eastern Uganda. *Am J Trop Med Hyg* 2012;**87**:30–5. doi:10.4269/ajtmh.2012.11-0732
- 12 Druetz T, Ridde V, Kouanda S, *et al.* Utilization of community health workers for malaria treatment: results from a three-year panel study in the districts of Kaya and

- Zorgho, Burkina Faso. *Malar J* 2015;**14**:71. doi:10.1186/s12936-015-0591-9
- 13 Amouzou a., Hazel E, Shaw B, *et al.* Effects of the integrated Community Case Management of Childhood Illness Strategy on Child Mortality in Ethiopia: A Cluster Randomized Trial. *Am J Trop Med Hyg* 2016;**94**:596–604. doi:10.4269/ajtmh.15-0586
- 14 Amouzou a., Kanyuka M, Hazel E, *et al.* Independent Evaluation of the integrated Community Case Management of Childhood Illness Strategy in Malawi Using a National Evaluation Platform Design. *Am J Trop Med Hyg* 2016;**94**:574–83. doi:10.4269/ajtmh.15-0584
- 15 Munos M, Guiella G, Robertson T, *et al.* The independent evaluation of the Rapid Scale-Up programme to reduce under-five mortality in Burkina Faso. *Submitt Publ* 2015;**94**:584–95. doi:10.4269/ajtmh.15-0585
- 16 Hazel E, Bryce J. On Bathwater, Babies, and Designing Programmes for Impact: Evaluations of the Integrated Community Case Management Strategy in Burkina Faso, Ethiopia, and Malawi. *Am J Trop Med Hyg* 2016;**94**:568–70. doi:10.4269/ajtmh.94-3intro1
- 17 Johnson AD, Thiero O, Whidden C, *et al.* Proactive community case management and child survival in periurban Mali. *BMJ Glob Heal* 2018;**3**:e000634. doi:10.1136/bmjgh-2017-000634
- 18 Colvin CJ, Smith HJ, Swartz A, *et al.* Understanding careseeking for child illness in sub-Saharan Africa: A systematic review and conceptual framework based on qualitative research of household recognition and response to child diarrhoea, pneumonia and malaria. *Soc Sci Med* 2013;**86**:66–78. doi:10.1016/j.socscimed.2013.02.031
- 19 Johnson A, Goss A, Beckerman J, *et al.* Hidden costs: the direct and indirect impact of user fees on access to malaria treatment and primary care in Mali. *Soc Sci Med* 2012;**75**:1786–92. doi:10.1016/j.socscimed.2012.07.015
- 20 District Sanitaire de Bankass Ministère de l'Hygiène et Santé Publique. Microplanification des Associations de Santé Communautaire. 2016.
- 21 Who/Unicef. WHO / UNICEF JOINT STATEMENT Integrated Community Case Management: An equity-focused strategy to improve access to essential treatment services for children. *United Nations Child Fund* 2012;:8.[http://www.unicef.org/health/files/iCCM\\_Joint\\_Statement\\_2012.pdf](http://www.unicef.org/health/files/iCCM_Joint_Statement_2012.pdf)
- 22 Ministère de la Santé et l'Hygiène Publique. Soins Essentiels Dans La Communauté: Guide National Pour La Mise En Oeuvre. 2010.
- 23 Hayes RJ, Moulton LH. *Cluster Randomised Trials, Second Edition*. 2 edition. Boca Raton: : Chapman and Hall/CRC 2017.
- 24 Maiga OM, Kayentao K, Traoré BT, *et al.* Superiority of 3 Over 2 Doses of Intermittent Preventive Treatment With Sulfadoxine-Pyrimethamine for the Prevention of Malaria During Pregnancy in Mali: A Randomized Controlled Trial. *Clin Infect Dis* 2011;**53**:215–23. doi:10.1093/cid/cir374
- 25 Kayentao K, Kodio M, Newman RD, *et al.* Comparison of Intermittent Preventive

1  
2  
3 Treatment with Chemoprophylaxis for the Prevention of Malaria during Pregnancy  
4 in Mali. *J Infect Dis* 2005;**191**:109–16. doi:10.1086/426400

- 5  
6 26 Schemper M, Wakounig S, Heinze G. The estimation of average hazard ratios by  
7 weighted Cox regression. *Stat Med* 2009;**28**:2473–89. doi:10.1002/sim.3623  
8  
9  
10  
11  
12  
13  
14  
15  
16  
17  
18  
19  
20  
21  
22  
23  
24  
25  
26  
27  
28  
29  
30  
31  
32  
33  
34  
35  
36  
37  
38  
39  
40  
41  
42  
43  
44  
45  
46  
47  
48  
49  
50  
51  
52  
53  
54  
55  
56  
57  
58  
59  
60

## Online Supplementary Document

### Description of the intervention

#### *Reinforcement of facility-based care*

Prior to the commencement of the trial, all clusters will receive a health system strengthening intervention implemented at all seven study PHCs. To meet anticipated increase in utilisation as a result of the trial, each PHC will receive targeted, physical infrastructure improvements, including having separate general and maternity units, separate observation rooms for men and women, a pharmacy, and solar panels for continuous electricity. All PHC staff from the seven participating sites will receive training in priority areas of clinical care, including integrated management of childhood illness according to WHO guidelines, antenatal and delivery care, post-natal and newborn care, family planning, and rational prescription. Each PHC will recruit a formally-trained midwife to complement the existing auxiliary midwives that were responsible for PHC maternity care prior to the study.

#### *CHW recruitment*

CHWs will be recruited from the cluster in which they will work. They must be between 18 to 45 years old, inclusive, and know how to read and write in French. Female candidates will be encouraged. Community leaders, including mayors, village chiefs, and members of the Community Health Association (the administrative body of the PHC) will nominate potential candidates who meet these criteria. If community leaders are unable to identify an eligible candidate from the cluster, a CHW from a nearby village will be recruited and will relocate to the cluster in which he/she will work.

1  
2  
3 CHW candidates will participate in the pre-service training (described below) after which the  
4  
5 final selection of CHWs will be made based on the trainer's evaluation of each candidate's  
6  
7 mastery of the protocol, active listening ability, spirit of commitment, and communication skills.  
8  
9  
10 CHWs who previously worked in the study area will be recruited and retrained according to their  
11  
12 randomised assignment. In both arms, the community leaders of the cluster will ensure that the  
13  
14 selected CHW(s) has a health post, which will be located either at the CHW's home or at a  
15  
16 separate site, depending on the resources and preferences of the community.  
17  
18  
19  
20

### 21 *CHW training*

22  
23 All selected CHWs will undergo a six-week, full time pre-service training and a one-week full  
24  
25 time annual reinforcement training, conducted separately by arm. Training curriculum for the  
26  
27 following will be the same for both arms: iCCM of malaria, diarrhoea, acute respiratory  
28  
29 infections, and malnutrition; newborn care; antenatal and post-partum care; contraception;  
30  
31 vaccination schedules; CHW roles and responsibilities, including patient communication, good  
32  
33 clinical practices, and stock management; and data collection on a phone-based CHW  
34  
35 application. In the intervention arm, the training curriculum will include additional modules on  
36  
37 proactive case detection, door-step care, and home-based follow-up.  
38  
39  
40  
41  
42  
43

### 44 *CHW supervision*

45  
46 All participating CHWs will receive monthly one-on-one supervision and weekly group  
47  
48 supervision with a dedicated CHW supervisor, recruited and trained for this exclusive purpose.  
49  
50 Each supervisor will be responsible for between 15 and 20 CHWs, with an equal number of  
51  
52 CHWs from intervention and control arms. In turn, CHW supervisors themselves will receive  
53  
54  
55  
56  
57  
58  
59  
60

1  
2  
3 monthly one-on-one supervision and weekly group supervision from a manager, following the  
4 same strategy used for CHW supervision.  
5  
6  
7  
8  
9

10 Group supervision sessions will be held separately for CHWs assigned to each study arm in  
11 order to minimize spill-over effects. Group supervision sessions will be held every week for the  
12 first three months after intervention launch and every two weeks after the first three months.  
13  
14 During group supervision sessions, which will last approximately two hours, the supervisor and  
15 CHWs will discuss common challenges faced by CHWs in the field and potential solutions. At  
16 the final group session of the calendar month, the supervisor and CHWs will agree on a schedule  
17 of individual supervision sessions for the coming month. Each CHW will know in advance the  
18 date and time of his/her next individual supervision session, but not the location within his/her  
19 catchment area at which it will take place.  
20  
21  
22  
23  
24  
25  
26  
27  
28  
29  
30  
31  
32

33 Monthly individual CHW supervision activities will include the following: (i) home visits  
34 conducted without the CHW in which the supervisor conducts household interviews in the  
35 absence of the CHW to elicit patient or caregiver perspectives of CHW care; (ii) direct  
36 observation in which the supervisor observes the CHW providing care (at the health post for  
37 CHWs in the control arm, during home visits for CHWs in the intervention arm); and (iii) one-  
38 on-one feedback in which the supervisor and CHW identify areas of strength and areas for  
39 improvement.  
40  
41  
42  
43  
44  
45  
46  
47  
48  
49  
50

51 *CHW reporting*  
52  
53  
54  
55  
56  
57  
58  
59  
60

1  
2  
3 CHWs will record all patient encounters using a CHW mobile application on an Android  
4  
5 smartphone. In addition to measuring aggregate process indicators, such as the number of  
6  
7 children under five evaluated per month, the data collected by the CHW application will be used  
8  
9 to generate CHW performance indicators, including coverage (percentage of population  
10  
11 interfacing with the CHW per month), speed (percentage of sick children under five treated  
12  
13 within one day of symptom onset), and quality of care (percentage of patient encounters  
14  
15 conducted without protocol error). The data collected by the CHW application will also be used  
16  
17 to identify system-level challenges, such as drug stock-outs.  
18  
19  
20  
21  
22  
23

24 CHWs who commit any protocol deviation (e.g., conducting proactive case finding home visits  
25  
26 in the control arm, not conducting proactive case finding home visits in the intervention arm),  
27  
28 will be required first to work closely with the supervisor to address the problem, and then will be  
29  
30 summoned to a meeting with the administrative body of the PHC if the problem persists, and  
31  
32 finally removed from his/her post if performance does not improve. Falsification of data or  
33  
34 charging user fees to patients (verified through supervisory home visits without the CHW and/or  
35  
36 patient data auditing) will constitute immediate termination.  
37  
38  
39  
40  
41  
42

### 43 *CHW compensation*

44 All CHWs will be compensated for their work with a monthly salary of 40,000 FCFA  
45  
46 (approximately 70 USD), which is circa minimum wage. CHWs will receive an additional 3000  
47  
48 FCFA (approximately 5.40 USD) of monthly phone credit, and 1000 FCFA (approximately 1.80  
49  
50 USD) for each group supervision meeting to cover transportation costs. All CHWs will also be  
51  
52  
53  
54  
55  
56  
57  
58  
59  
60

1  
2  
3 enrolled in Mali's payroll tax and social security retirement benefits (INPS) system.  
4

5 Compensation will be the same in both study arms.  
6  
7  
8  
9  
10  
11  
12  
13  
14  
15  
16  
17  
18  
19  
20  
21  
22  
23  
24  
25  
26  
27  
28  
29  
30  
31  
32  
33  
34  
35  
36  
37  
38  
39  
40  
41  
42  
43  
44  
45  
46  
47  
48  
49  
50  
51  
52  
53  
54  
55  
56  
57  
58  
59  
60



# BMJ Open

## Proactive Community Case Management and Child Survival: Protocol for a Cluster Randomised Controlled Trial

|                                 |                                                                                                                                                                                                                                                                                                                                                                                                                                                                                                                                                                                                                                                                                                                                  |
|---------------------------------|----------------------------------------------------------------------------------------------------------------------------------------------------------------------------------------------------------------------------------------------------------------------------------------------------------------------------------------------------------------------------------------------------------------------------------------------------------------------------------------------------------------------------------------------------------------------------------------------------------------------------------------------------------------------------------------------------------------------------------|
| Journal:                        | <i>BMJ Open</i>                                                                                                                                                                                                                                                                                                                                                                                                                                                                                                                                                                                                                                                                                                                  |
| Manuscript ID                   | bmjopen-2018-027487.R1                                                                                                                                                                                                                                                                                                                                                                                                                                                                                                                                                                                                                                                                                                           |
| Article Type:                   | Protocol                                                                                                                                                                                                                                                                                                                                                                                                                                                                                                                                                                                                                                                                                                                         |
| Date Submitted by the Author:   | 26-Mar-2019                                                                                                                                                                                                                                                                                                                                                                                                                                                                                                                                                                                                                                                                                                                      |
| Complete List of Authors:       | Whidden, Caroline; Muso, Research<br>Treleven, Emily; University of Michigan<br>Liu, Jenny; University of California, San Francisco, Department of Social and Behavioral Sciences<br>Padian, Nancy; University of California, Berkeley, School of Public Health<br>Poudiougou, Belco; Muso, Research<br>Bautista-Arredondo, Sergio; Instituto Nacional de Salud Publica<br>Fay, Michael; National Institutes of Allergy and Infectious Disease<br>Samaké, Salif; Malian Ministry of Health and Public Hygiene<br>Johnson, Ari; University of California San Francisco, ZSFG Division of Hospital Medicine<br>Kayentao, Kassoum; University of Sciences Techniques and Technologies of Bamako, Malaria Research & Training Centre |
| <b>Primary Subject Heading</b>: | Health services research                                                                                                                                                                                                                                                                                                                                                                                                                                                                                                                                                                                                                                                                                                         |
| Secondary Subject Heading:      | Global health, Infectious diseases                                                                                                                                                                                                                                                                                                                                                                                                                                                                                                                                                                                                                                                                                               |
| Keywords:                       | Child health, Maternal health, Cluster randomized trial, Community Health Workers, integrated Community Case Management, Child mortality                                                                                                                                                                                                                                                                                                                                                                                                                                                                                                                                                                                         |
|                                 |                                                                                                                                                                                                                                                                                                                                                                                                                                                                                                                                                                                                                                                                                                                                  |

SCHOLARONE™  
Manuscripts

## Proactive Community Case Management and Child Survival: Protocol for a Cluster Randomised Controlled Trial

Caroline Whidden<sup>1</sup>, Emily Treleaven<sup>2</sup>, Jenny Liu<sup>3</sup>, Nancy Padian<sup>4</sup>, Belco Poudiougou<sup>1</sup>, Sergio Bautista-Arredondo<sup>4,5</sup>, Michael Fay<sup>6</sup>, Salif Samaké<sup>7</sup>, Ari Johnson<sup>1,8</sup>, Kassoum Kayentao<sup>1,9</sup>

<sup>1</sup> Muso, Bamako, Mali and San Francisco, CA, USA

<sup>2</sup> University of Michigan, 426 Thompson St., Ann Arbor, MI 48106, USA

<sup>3</sup> University of California, San Francisco, Institute for Health and Aging, Department of Social and Behavioral Sciences, 3333 California St Suite 340, University of California, San Francisco, San Francisco, CA 94118, USA

<sup>4</sup> University of California, Berkeley, School of Public Health, 50 University Hall, Berkeley, CA 94720-7360, USA

<sup>5</sup> Instituto Nacional de Salud Pública, Avenida Universidad 655, Santa María Ahuacatlán, 62100 Cuernavaca, Mor., Mexico

<sup>6</sup> National Institutes of Allergy and Infectious Disease, 5601 Fishers Lane, MSC 9806, Bethesda, MD 20892-9806, Unites States of America

<sup>7</sup> Malian Ministry of Health and Public Hygiene, BP.233, Bamako, Mali

<sup>8</sup> University of California, San Francisco School of Medicine, Box 1364, San Francisco, CA 94143-1364, USA

<sup>9</sup> Malaria Research & Training Center, University of Sciences Techniques and Technologies of Bamako, Mali

Corresponding Author:

Caroline E Whidden

Muso

SEMA, Route de 501 Lodgements

Bamako, Mali.

Email: [cwhidden@musohealth.org](mailto:cwhidden@musohealth.org)

**Word count:**

## ABSTRACT

**Introduction:** Community health workers (CHWs)—shown to improve access to care and reduce maternal, newborn, and child morbidity and mortality—is re-emerging as a key strategy to achieve health-related Sustainable Development Goals. However, recent evaluations of national programmes for CHW-led integrated Community Case Management (iCCM) of common childhood illnesses have not found benefits on access to care and child mortality. Developing innovative ways to maximise the potential benefits of iCCM is critical to achieving the SDGs.

**Methods and analysis:** An unblinded, cluster randomised controlled trial in rural Mali aims to test the efficacy of the addition of door-to-door proactive case detection by CHWs compared to a conventional approach to iCCM service delivery in reducing under-five mortality. In the intervention arm, 69 village-clusters will have CHWs who conduct daily proactive case-finding home visits and deliver doorstep counsel, care, referral, and follow-up. In the control arm, 68 village-clusters will have CHWs who provide the same services exclusively out of a fixed community health site. A baseline population census will be conducted of all people living in the study area. All women of reproductive age will be enrolled in the study and surveyed at baseline, 12, 24, and 36 months. The survey includes a life table tracking all live births and deaths occurring prior to enrolment through the 36 months of follow-up in order to measure the primary endpoint: under-five mortality, measured as deaths among children under five years of age per 1,000 person-years at risk of mortality.

**Ethics and dissemination:** The trial has received ethical approval from the Ethics Committee of the Faculty of Medicine, Pharmacy and Dentistry, University of

1  
2  
3 Bamako. The results will be disseminated through peer-reviewed publications,  
4  
5 national and international conferences and workshops, and media outlets.  
6  
7  
8  
9

10 **Trial registration:** ClinicalTrials.gov, NCT02694055. Registered 13 January 2016,  
11  
12 <https://clinicaltrials.gov/show/NCT02694055>.  
13  
14

15  
16  
17 **Key words:** Child health; Maternal health; Cluster randomized trial; Community  
18  
19 Health Workers, integrated Community Case Management, Child mortality  
20  
21  
22

### 23 24 **Strengths and limitations of this study**

- 25 • This is a cluster randomised controlled trial powered to detect a 25% relative  
26 difference in the incidence rate of under-five mortality between the two study  
27 arms.  
28  
29
- 30 • The trial will generate evidence on the efficacy, cost-effectiveness, and equity  
31 of door-to-door proactive case detection by CHWs on access to care and child  
32 mortality.  
33  
34
- 35 • The intervention is designed to facilitate public sector adoption and scale-up if  
36 found to be effective.  
37  
38
- 39 • The large geographic area and three-year time frame leave the study  
40 vulnerable to unexpected events that may influence the extent to which the  
41 intervention can be implemented per protocol.  
42  
43
- 44 • Changes to the health system or other contextual factors in the intervention  
45 area, such as drug stock-outs, health centre staff strikes, concurrent  
46 programme implementation by other actors, and political insecurity may be  
47 beyond the control of the study implementers.  
48  
49  
50  
51  
52  
53  
54  
55  
56  
57  
58  
59  
60

## INTRODUCTION

The vast majority of maternal, newborn, and child deaths in low- and middle-income countries are preventable. Evidence-based and cost-effective methods for prevention and treatment are available for the leading causes of death, yet many still face barriers to obtaining timely, quality, appropriate care. If community-based interventions, such as the treatment of malaria with artemisinin compounds, oral rehydration solution for childhood diarrhoea, oral antibiotics for pneumonia, nutritional interventions during pregnancy, and hand washing with soap, were scaled to achieve 90% coverage in high-burden countries before 2020, an estimated 6.9 million maternal and child deaths could be averted.[1]

Integrated Community Case Management (iCCM) of common childhood illnesses entails a package of services to diagnose, treat and refer children under five with malaria, diarrhoea, pneumonia, or moderate malnutrition, delivered by community health workers (CHWs).[2] Community case management of common childhood illnesses has been shown to improve access to care[3–5] and treatment adherence,[3,6] and reduce mortality due to malaria,[7] diarrhoea,[3,8,9] pneumonia,[3,10,11] as well as all causes.[7,9,10]

Many countries in sub-Saharan Africa have adopted iCCM as an evidence-based strategy to improve child health.[12,13] However, the expected benefits of iCCM have not been realized in all contexts.[14–19] Several recent evaluations of national iCCM programmes did not find impacts on care seeking or child mortality, in part, study authors conclude, due to low demand for CHW services.[20–23] These national programmes shared certain design and implementation features that may have

1  
2  
3 contributed to the lack of overall effects by not addressing barriers to care, such as  
4 user fees for services, lack of frequent and dedicated CHW supervision for quality  
5 assurance, and community care provision exclusively (or primarily) for patients that  
6 seek care from a fixed health site. As more countries commit to scaling up CHW-led  
7 health care systems, it is critical that we understand how to best design and implement  
8 iCCM, and CHW services more broadly, in order to bring about their full potential.  
9  
10  
11  
12  
13  
14  
15  
16  
17  
18

19 To address this need, we designed a cluster randomised controlled trial to test door-to-  
20 door proactive case detection by CHWs compared to a conventional approach to  
21 iCCM service delivery, which relies on patient-initiated care-seeking. In both arms of  
22 the trial, CHWs will provide an integrated package of child, reproductive, and  
23 maternal health services, primary health centres (PHCs) will be reinforced in  
24 infrastructure and capacity, and user fees will be removed at all levels of care. The  
25 difference between the intervention (ProCCM) arm and the control (iCCM) arm is the  
26 proactive versus conventional approach to the delivery of community-based services.  
27 The comparator was chosen to isolate and assess the effects of one design feature of  
28 CHW service delivery: proactive case detection.  
29  
30  
31  
32  
33  
34  
35  
36  
37  
38  
39  
40  
41  
42  
43  
44

45 The ProCCM approach is designed to overcome additional social, structural, and  
46 health system barriers that may impede or lead to delayed access, even under a  
47 community-based comprehensive iCCM approach. At a systems level, these include  
48 the direct and indirect costs of care, including distance to care. At the household level,  
49 lack of resources, mistrust in the health care system, and complex familial decision-  
50 making dynamics due to in part to gender inequality can contribute to delays in  
51 reaching care.[24,25] By proactively seeking out patients and linking community  
52  
53  
54  
55  
56  
57  
58  
59  
60

1  
2  
3 members to the health care system, ProCCM is designed to reduce the time from  
4  
5 onset of condition to utilisation of health services, including direct provision of  
6  
7 comprehensive primary care services for all household members, ultimately reducing  
8  
9 mortality.  
10  
11

## 12 13 **METHODS AND ANALYSES**

### 14 15 **Study aims and hypothesis**

16  
17 Our cluster randomised controlled trial aims to:

- 18  
19  
20  
21 (1) Estimate the effect of adding door-to-door proactive case detection by CHWs  
22  
23 to an enhanced iCCM intervention on under-five child mortality; we  
24  
25 hypothesize that, after 36 months, the relative difference in the incidence rate  
26  
27 of under-five mortality between the two study arms will be greater than 25%.  
28  
29
- 30  
31 (2) Estimate the effect of adding door-to-door proactive case detection by CHWs  
32  
33 to an enhanced iCCM intervention on utilisation of reproductive, maternal,  
34  
35 and child health services.  
36  
37
- 38  
39 (3) Evaluate the ProCCM intervention model, compared to the iCCM control  
40  
41 model, in terms of cost-effectiveness, equity, and affordability at scale.  
42

### 43 44 **Study site**

45  
46 The trial will be conducted in the Bankass health district of the Mopti region in  
47  
48 eastern Mali, approximately 600 kilometres east of the nation's capital, Bamako. The  
49  
50 district has a 2016 population of approximately 300,000 people and is served by a  
51  
52 public secondary referral hospital located in Bankass, the largest town in the  
53  
54 district.[26] Within the Bankass health district, the study is being conducted in seven  
55  
56 (of 22) health catchment areas: Dimbal, Doundé, Ende, Kani Bozon, Koulongon,  
57  
58 Lessagou, and Soubala (Figure 1). The study area has a 2016 population of  
59  
60

1  
2  
3 approximately 100,000 people.[26] Each health catchment area is served by a PHC  
4  
5 operated by the Ministry of Health.  
6  
7

### 8 9 **Study design**

10 This is an unblinded, pragmatic, cluster-randomised controlled trial, with 69 village-  
11  
12 clusters in the intervention arm and 68 village-clusters in the comparison arm.  
13  
14

15 Clusters are randomised to receive either enhanced iCCM from stationary CHW(s)  
16  
17 serving patients exclusively at a community health site (control) as per Mali's  
18  
19 national iCCM strategy,[27] or ProCCM from CHW(s) conducting daily proactive  
20  
21 case-finding home visits in addition to serving patients at a community health site.  
22  
23

24 Only the intervention arm will receive door-to-door proactive case detection by  
25  
26 CHWs, including doorstep care and home-based follow-up.  
27  
28  
29

### 30 31 **Intervention**

32 Local community members—female candidates encouraged—who can read and write  
33  
34 in French will be recruited, trained, supervised, and supported as CHWs from the  
35  
36 village-cluster in which they will work. CHW coverage will be based on Mali's  
37  
38 national iCCM strategy, which recommends one CHW for a population of 700 in the  
39  
40 southern region where the study area is situated.[27] Clusters, therefore, may have  
41  
42 one or multiple resident CHWs, depending on the size of the cluster population.  
43  
44

45 Clusters with less than 200 people and within three kilometres of another cluster  
46  
47 assigned to the same study arm will share a CHW, provided there is no geographic  
48  
49 barrier (i.e., river) between the two clusters and no linguistic barrier for the CHW.  
50  
51  
52

53  
54 In both arms, CHWs will provide a comprehensive set of primary care services,  
55  
56 including iCCM in accordance with national and international standards,[28] as well  
57  
58 as maternal and reproductive health for women of reproductive age (see Table 1 for a  
59  
60



1  
2  
3 full description of the CHW package of care). CHW services will include counselling,  
4  
5  
6 diagnostics, treatment, referral to reinforced PHCs, and follow-up care. CHWs will be  
7  
8 required to be on call, available to receive and care for patients who seek them out, 24  
9  
10 hours per day, seven days per week. CHWs will receive a salary circa minimum wage  
11  
12 (40,000 FCFA per month), and user fees will be removed for all CHW and referral  
13  
14 services for all patients in the study area. A detailed description of the entire health  
15  
16 system strengthening intervention in both arms is provided in the Online  
17  
18 Supplementary Document.  
19  
20

21  
22  
23 *Control arm: Conventional CHW service delivery*

24  
25 In clusters assigned to the control arm, CHWs will be stationed at a community health  
26  
27 site to provide the comprehensive package of primary care services for at least four  
28  
29 hours per day, six days per week, available to receive patients seeking care. The  
30  
31 community health site is at the cluster level and separate from the PHC.  
32  
33

34  
35 *Intervention arm: Proactive CHW service delivery*

36  
37 In clusters assigned to the intervention arm, CHW(s) will be trained and deployed to  
38  
39 conduct proactive case finding, door-to-door home visits for at least two hours each  
40  
41 day, six days a week, with the goal of visiting each household at least two times each  
42  
43 month. During the home visit, CHWs will screen all household members for recent  
44  
45 illness or symptoms and provide services at the home, including follow-up for sick  
46  
47 children and adults, pregnant women, newborns, and post-partum mothers. In addition  
48  
49 to home visits, ProCCM CHWs will provide care at their community health site for at  
50  
51 least two hours a day, six days per week, according to a calendar shared with the  
52  
53 community. At the health site, CHWs will provide the same services as those offered  
54  
55 by CHWs in the control arm to care-seeking patients.  
56  
57  
58  
59  
60

### **Cluster definition and randomisation**

In order to identify distinct clusters, a field team visited all villages and hamlets in the study area and collected Global Positioning System (GPS) coordinates at the public space where community-wide meetings, announcements, and festivities are held. GPS coordinates were mapped and the cardinal distances between neighbouring villages/hamlets were calculated. Villages and hamlets one kilometre or less from one another were grouped into clusters, resulting in 160 individual villages and hamlets grouped into 137 unique clusters. A cluster definition based in geographic reality rather than administrative delineation helps to mitigate against contamination.

Clusters located 1.0 or more kilometres from a PHC were stratified by health catchment area and distance to the nearest PHC (1.0–5.0 kilometres vs. more than 5.0 kilometres). The cut-off point of 5.0 km was defined in accordance with national iCCM guidelines,[27] which deploys CHWs to deliver iCCM services only in communities greater than 5.0 km from a PHC. An additional stratum included all villages where the PHC was located to ensure balanced assignment of PHC villages across arms. Within each strata, clusters were randomly assigned to the control or treatment arm using a computer-generated random number. Randomisation was conducted by a member of the research team based in the United States who did not have any involvement in CHW recruitment or participant enrolment. Trial statisticians will remain blinded to cluster allocation until the end of the trial.

### **Sample size and primary and secondary endpoints**

#### *Primary endpoint*

The primary endpoint is under-five mortality, measured as deaths among children under five years of age per 1,000 person-years at risk of mortality. In Mopti, the

1  
2  
3 region of the study site, the ten-year under-five mortality rate (U5MR) was 111 deaths  
4 per 1,000 live births during the 2012-2013 DHS, which is higher than the national  
5 U5MR.[29] Since the 2013 DHS, intermittent prophylactic therapy in children for  
6 malaria has been rolled out across the region. As Intermittent Preventive Treatment in  
7 Children (IPTc) is associated with a risk ratio of all-cause under-five mortality of 0.66  
8 in areas of seasonal transmission of malaria,[30] we estimate that baseline U5MR in  
9 the area of the intervention will be  $111 * 0.66 = 72.6/1000$ .

10  
11  
12  
13  
14  
15  
16  
17  
18  
19  
20  
21 The sample size for the trial was based on this primary endpoint, derived using  
22 methods for cluster-randomised trials[31] in which each cluster was treated as an  
23 observation and the cluster-level outcome was defined as the U5MR per person-years  
24 at risk. We used a negative binomial model to simulate the number of deaths among  
25 children under five. According to 2014 national population estimates adjusted for  
26 2016 using a 2.2% annual growth rate,[26] the seven health catchment areas  
27 encompassed a population of 103,848 inhabitants. Assuming that 20% of the  
28 population was children aged 0-59 months and 22% was women aged 15 to 49, we  
29 calculated a mean of 152 children and 167 women per cluster. Person-years at risk  
30 were calculated assuming three years of prospective study follow-up with 10%  
31 attrition based on experience with previous trials in Mali.[32,33] We used a  
32 coefficient of variation of  $k=0.29$ [31] to model the extra variation due to clustering  
33 ( $1/k^2$  is the size parameter in the negative binomial model). With these parameters, the  
34 trial will be able to detect a relative difference of 25% ( $\alpha = 0.05$ , two-tailed test)  
35 in the under-five mortality incidence between treatment and control arms with 81.8%  
36 power after 36 months.

### 37 38 39 40 41 42 43 44 45 46 47 48 49 50 51 52 53 54 55 56 57 58 *Secondary endpoints* 59 60

1  
2  
3 We will also estimate the effect of the intervention on a number of secondary  
4 endpoints:  
5

- 6  
7  
8 (a) Infant mortality (deaths per 1,000 live births among children aged 0-11 months);  
9  
10 (b) Newborn mortality (deaths per 1,000 live births among children aged 0-28 days);  
11  
12 (c) Pregnancy-related mortality ratio (number of deaths among women while  
13 pregnant or within 42 days of delivery or termination per 100,000 live births per  
14 year) if there is sufficient and robust data to do so;  
15  
16 (d) Receipt of oral rehydration therapy and zinc within 24 hours of diarrhea onset  
17 among children under five;  
18  
19 (e) Receipt of diagnostic testing and/or effective treatment for malaria within 24  
20 hours of fever onset among children under five;  
21  
22 (f) Evaluation by a qualified provider within 24 hours of symptom onset among  
23 children under five with cough and/or fast breathing;  
24  
25 (g) Receipt of three or more doses of Sulfadoxine-Pyrimethamine as Intermittent  
26 Preventive Treatment during a woman's most recent pregnancy;  
27  
28 (h) Enrollment in ANC with a skilled provider in the first trimester during a woman's  
29 most recent pregnancy;  
30  
31 (i) Completing four or more antenatal care (ANC) consultations with a skilled  
32 provider during a woman's most recent pregnancy;  
33  
34 (j) Use of a modern method of contraception among women of reproductive age.  
35  
36  
37  
38  
39  
40  
41  
42  
43  
44  
45  
46  
47  
48  
49

### 50 **Inclusion criteria**

51  
52 Any individual in the study area at any point during the study period, including  
53 visitors, are eligible to receive the health services offered through the intervention.

54  
55 Only permanent residents of the study area are eligible to be included in the  
56 household survey. All women aged 15 to 49 permanently residing in the study area at  
57  
58  
59  
60

1  
2  
3 baseline who provide consent or assent and report no foreseeable plans to leave the  
4  
5 study area are eligible to participate in the women's questionnaire of the household  
6  
7 survey—the data source used for the measurement of primary and secondary  
8  
9 endpoints. Women who did not meet the inclusion criteria at baseline but who  
10  
11 become newly eligible during the course of the study are invited to participate at  
12  
13 follow-up household survey rounds.  
14  
15

### 16 17 18 **Sources of data**

19  
20 The effects of the ProCCM model of service delivery, compared to the iCCM model,  
21  
22 for the primary and secondary endpoints will be assessed using data from three  
23  
24 sources: (1) household surveys, (2) the CHW mobile application, and (3) facility  
25  
26 records.  
27  
28

#### 29 30 *Household surveys*

31  
32 A household survey will be administered to all eligible women at baseline (prior to  
33  
34 the launch of the intervention), and 12, 24, and 36 months after the intervention start.  
35  
36 Surveyors will not be members of the villages they survey, nor will they be members  
37  
38 of the intervention health care delivery staff. All surveyors will be female, as the  
39  
40 survey tool contains sensitive questions regarding contraception and reproductive  
41  
42 health. The survey includes a household roster, which may be completed by the  
43  
44 female head of household, and a questionnaire administered to consenting or  
45  
46 assenting women of reproductive age (15-49).  
47  
48  
49  
50  
51

52  
53 The household survey instrument was adapted from the Mali Demographic and  
54  
55 Health Survey (DHS) and designed in Open Data Kit, which permits real-time quality  
56  
57 and completeness control on data collection. The women's questionnaire will include  
58  
59  
60

1  
2  
3 a full birth history to capture all live births, which will then be updated during each of  
4  
5 the follow-up survey rounds. To track maternal mortality, the survey will record all  
6  
7 household deaths occurring the previous year, with additional information on timing  
8  
9 of death (during pregnancy, childbirth, after childbirth) for women of reproductive  
10  
11 age. The survey also captures detailed information on household and individual socio-  
12  
13 demographic characteristics, access and utilisation of reproductive and maternal  
14  
15 health care, and care-seeking behaviours and investments for recently ill children  
16  
17 under five. Follow-up household survey rounds will add new household members to  
18  
19 the study cohort (e.g., due to births, migration) and record absences due to out-  
20  
21 migration or death. Surveyors will attempt to contact each eligible woman up to three  
22  
23 additional times if she is absent at the first visit.  
24  
25  
26  
27  
28

### 29 *CHW mobile application data*

30  
31 CHWs in both study arms will be equipped with an Android smartphone and trained  
32  
33 to use a mobile application to track services rendered. The app is also designed to be a  
34  
35 job aid with integrated data validation and prompts to guide the CHW through the  
36  
37 appropriate case management protocol. Population census data collected at baseline,  
38  
39 including individual unique identifiers and demographic information, will be pre-  
40  
41 populated into the CHW application so that each CHW can access the records of  
42  
43 families in his/her service delivery zone. During each encounter with a prospective  
44  
45 patient, the CHW will either identify the individual in the application or register  
46  
47 newborns, new arrivals, or visitors, before selecting the appropriate form in the  
48  
49 application for the specific health concern (e.g., malaria case management). The types  
50  
51 of actions displayed under a patient's profile are linked to her sex and age (e.g.,  
52  
53 pregnancy follow-up is displayed only for women aged 15-49). The application will  
54  
55  
56  
57  
58  
59  
60

1  
2  
3 also alert the CHW of upcoming tasks related to patient follow-up, with an action  
4  
5 calendar for 24-hour follow-up available starting at midnight each day.  
6  
7

### 8 9 *Facility data*

10  
11 Each PHC will be equipped with five laptop computers, and the physician-in-chief,  
12  
13 midwife, pharmacist, vaccine administration technician, and receptionist will be  
14  
15 trained in data collection on an EMR system. Population census data collected at  
16  
17 baseline will be imported into the EMR system, including individual unique  
18  
19 identifiers and basic demographic information. When attending a PHC, patients will  
20  
21 present first to reception, where their medical records will be identified using their  
22  
23 unique identifier, name, family and/or village information. During the patient  
24  
25 consultation, the service provider will record patient health information (i.e.,  
26  
27 diagnostic tests, results, treatment, posology) in both the EMR and in the paper  
28  
29 facility registers, the source documents of the Malian Ministry of Health and required  
30  
31 by law. Referral by a CHW will be recorded.  
32  
33  
34  
35  
36

### 37 **Analytical plan**

38  
39 Analyses of the primary and secondary endpoints will estimate intention-to-treat  
40  
41 (ITT) effects.  
42  
43  
44

### 45 *Analysis of primary endpoint*

46  
47 Using data collected prospectively in the 12-, 24- and 36-month follow-up household  
48  
49 surveys, we will test for the difference in the incidence of deaths among children  
50  
51 under five across treatment and control arms using a Poisson regression model with  
52  
53 cluster-level random effects, controlling for household distance to PHC (less than five  
54  
55 kilometres vs. five kilometres or more). Children surveyed at baseline will contribute  
56  
57 person-years of exposure from the start date of the trial's intervention launch; children  
58  
59  
60

1  
2  
3 born during the trial will contribute person-years of exposure beginning at birth.  
4  
5 Children who enter the trial after baseline will contribute person-years of exposure  
6  
7 beginning at the household survey interview date in which they are enrolled. All  
8  
9 children included in the analysis will contribute person-years through the date of their  
10  
11 death, or are right-censored on their fifth birthday or the end date of the trial,  
12  
13 whichever comes first. The coefficient of interest will be the incidence rate ratio  
14  
15 estimated on a dichotomous variable that indicates the child's residence in a treatment  
16  
17 versus control cluster. We will control for the non-constant risk of mortality in early  
18  
19 childhood by controlling for age (in months) constant over time, and will control for  
20  
21 any individual-level characteristics that are unbalanced at baseline. To estimate  
22  
23 mortality, a child's date of birth, date of interview, vital status at interview, and if  
24  
25 applicable, date of death are required. We will replicate the procedures for missing  
26  
27 mortality data used in the Demographic and Health Surveys, described in detail  
28  
29 elsewhere.[34]  
30  
31  
32  
33  
34  
35

### 36 *Analysis of secondary endpoints*

37  
38 The same modelling approach will be used to estimate ITT effects for secondary  
39  
40 endpoints (excluding the covariate for child's age); regression analyses will test the  
41  
42 significance of the regression coefficient on the treatment assignment variable.  
43  
44 Linking functions will be chosen based on the type of outcome variable analysed (i.e.,  
45  
46 logit for dichotomous outcomes). If 10% or fewer observations have missing  
47  
48 secondary outcome data, we will drop observations from analysis; otherwise, we will  
49  
50 determine and apply sample weights to estimates derived from the complete sample  
51  
52 of observations. For any secondary endpoints that differ significantly by arm at  
53  
54 baseline, we will use a difference-in-differences estimation approach to account for  
55  
56 this difference.  
57  
58  
59  
60



1  
2  
3 Per-protocol estimates: ITT estimates will be compared to estimates from a per-  
4  
5 protocol analysis of primary and secondary outcomes. Our per-protocol analysis will  
6  
7 estimate the effects of the intervention only for households that received the ProCCM  
8  
9 CHW services according to the intervention protocol. This will be defined as  
10  
11 households, which report they have received two or more visits from a CHW in the  
12  
13 month preceding the household survey for each year they participated in the survey,  
14  
15 regardless of treatment assignment. Finally, exploratory analyses will be conducted to  
16  
17 assess the existence and magnitude of heterogeneous treatment effects according to  
18  
19 village population size and household wealth.  
20  
21  
22  
23  
24

#### 25 *Cost-effectiveness analysis*

26  
27 Cost-effectiveness analysis (CEA) compares different programme alternatives in  
28  
29 terms of their cost-effectiveness ratio, which can be thought of as the average cost per  
30  
31 unit of impact or benefit (e.g., cost per life year saved). In most cases, CEA is used to  
32  
33 determine whether or not a new alternative policy is better than the status quo, or  
34  
35 whether the extra cost is worth the extra benefit. In such cases, the incremental cost-  
36  
37 effectiveness ratio (ICER) is used, which takes the ratio between the incremental costs  
38  
39 of the new programme with respect to the status quo, to the incremental benefits of  
40  
41 the new programme with respect to the status quo. We will perform an ICER analysis  
42  
43 to evaluate the relative cost-effectiveness of the ProCCM model with respect of the  
44  
45 iCCM model.  
46  
47  
48  
49  
50

51 We will calculate the total economic costs of both programmatic models, which will  
52  
53 reflect the monetary value of programme and household resources used to deliver and  
54  
55 access services, respectively. From the programme perspective, these will include  
56  
57 personnel and other recurrent costs such as drugs, laboratory tests and other inputs  
58  
59  
60

1  
2  
3 used to provide services. These data will come from three sources: (1) the CHW  
4 mobile application, which reflects all services and supplies used by CHWs for service  
5 provision; (2) PHC EMR, which include the services rendered at the PHC and  
6 resources will be valued at prices paid by the Ministry of Health; (3) programme  
7 records, including CHW's value of work time vis-à-vis salaries, and productivity data  
8 from the mobile application for time and services given. From the household  
9 perspective, costs include time used to access health services, valued at their  
10 opportunity costs (i.e., time lost from work), as well as out-of-pocket expenses such  
11 as paying for drugs or health services. These data will be obtained from the household  
12 surveys, which asks about out-of-pocket expenditures, time spent accessing services,  
13 and earnings from paid work.  
14  
15  
16  
17  
18  
19  
20  
21  
22  
23  
24  
25  
26  
27  
28

### 29 **Patient and public involvement**

30  
31 The study was designed and implemented in partnership with national, district, and  
32 local health officials of the Malian Ministry of Health. Bankass health district was  
33 chosen in consultation with the Ministry of Health for three reasons: (i) health care  
34 utilisation (prenatal and curative consultations) was low and under-five mortality was  
35 high; (ii) there were no overlapping interventions by other nongovernmental  
36 organizations at the time and for intended period of the trial; and (iii) local authorities  
37 were highly engaged and interested in collaborating on study implementation.  
38  
39  
40  
41  
42  
43  
44  
45  
46  
47

48 Research questions and outcome measures were also chosen in consultation, to  
49 answer questions of key concern to government partners for informing the design of  
50 the national strategic plan for iCCM scale-up, including whether the intervention is  
51 equitable, cost-effective, and affordable at scale. Community consultation and  
52 permission will be sought prior to trial commencement in meetings with  
53 representatives of the village-clusters, such as village chiefs and their advisories,  
54  
55  
56  
57  
58  
59  
60

1  
2  
3 politico-administrative authorities, religious leaders, and representatives of women's  
4 and youth associations. Representatives will then communicate with community  
5 members via open public meetings. Once the study has terminated, results will be  
6 disseminated to participants via dissemination workshops at all levels of local,  
7 regional, and national representation.  
8  
9  
10  
11  
12  
13

### 14 15 **Ethics and dissemination**

16  
17 This trial is registered with ClinicalTrials.gov (NCT02694055). Ethical approval was  
18 obtained from the Ethics Committee of the Faculty of Medicine, Pharmacy and  
19 Dentistry, University of Bamako (2016/03/CE/FMPOS). The University of California,  
20 San Francisco exempted secondary analysis of the trial data from ethical approval.  
21 External monitoring of the study will be assured by a Clinical Research Associate  
22 external to the trial team. Any substantial protocol amendments or deviations, or any  
23 unintended effects of trial interventions or conduct, will be submitted to the Ethics  
24 Committee and records reviewed by the CRA.  
25  
26  
27  
28  
29  
30  
31  
32  
33  
34  
35  
36

37 Surveyors will obtain informed consent from all household survey respondents prior  
38 to enrolment in the trial, or from the respondent's parent or guardian if she is a minor.  
39 Identifying information (i.e. proper name, phone number) will be stored separately  
40 from the survey data, linked by the registration ID. Access to identifying information  
41 will be restricted to the data collection and management team; trial statisticians and  
42 other external collaborators will access only de-identified data.  
43  
44  
45  
46  
47  
48  
49  
50  
51

52 An independent data safety and monitoring board (DSMB) will provide oversight  
53 throughout the trial. The DSMB will oversee participant safety and evaluate interim  
54 results to determine if the trial should be stopped early. Interim analyses of the  
55 primary endpoint (under-five mortality) will be performed at 12 and 24 months,  
56  
57  
58  
59  
60

1  
2  
3 estimated using data from the first and second follow-up household surveys. The  
4  
5 DSMB will terminate the study early if a 50% relative difference in under-five  
6  
7 mortality is detected after 12 months (statistical significance at  $p < 0.001$ ) or a 35%  
8  
9 relative difference in under-five mortality after 24 months ( $p < 0.001$ ), a stopping rule  
10  
11 more stringent than Haybittle-Peto stopping rules.[35,36] At the end of the trial  
12  
13 period, or if the trial is terminated early, all participating villages will receive the care  
14  
15 with the condition identified in the superior study arm.  
16  
17  
18  
19

20  
21 Trial results will be published in peer-reviewed journals following the International  
22  
23 Committee of Medical Journal Editors (ICJME) guidelines. Findings will be  
24  
25 disseminated via conferences and workshops with national and international  
26  
27 stakeholders in community-based healthcare delivery including researchers,  
28  
29 policymakers, and practitioners. De-identified data will be made publicly available  
30  
31 after the conclusion of the trial and publication of the main effects.  
32  
33  
34

## 35 **DISCUSSION**

36  
37 Supported by the emergence of global health guidelines and the accumulation of  
38  
39 rigorous evidence on the efficacy of iCCM, countries across sub-Saharan Africa are  
40  
41 scaling up iCCM to improve child health.[12,13] Yet, the most recent evaluations of  
42  
43 national iCCM programmes suggest further improvements in the delivery of iCCM  
44  
45 programmes are necessary to reduce under-five mortality.[20–23] Because the core  
46  
47 design and implementation of CHW services varies across health systems, their  
48  
49 optimal features must be identified and evaluated for iCCM to realise its full  
50  
51 potential. This includes identifying how financing mechanisms, health system  
52  
53 integration, packages and delivery of care, and CHW recruitment, training,  
54  
55 supervision, and compensation relate to care outcomes where CHWs are deployed as  
56  
57  
58  
59  
60

1  
2  
3 frontline health workers. The current trial aims to address one of these gaps by testing  
4 door-to-door proactive case detection by CHW against a conventional CHW service  
5 delivery approach on reducing under-five mortality risk. The results of the trial will  
6 thus be pertinent to policymakers and implementers to determine how CHWs may be  
7 better deployed for amplifying public health impact.  
8  
9  
10  
11  
12  
13  
14  
15  
16

17 The current study was designed and will be implemented in partnership with the Mali  
18 Ministry of Health to facilitate adoption of lessons learned and scale-up in the public  
19 sector if the intervention is found to be effective. In addition to the primary objective  
20 related to CHW service delivery mechanisms, secondary objectives explore questions  
21 of key concern to ministerial partners for informing the design of the national  
22 strategic plan for iCCM scale-up, including whether the intervention is equitable,  
23 cost-effective, affordable at scale. The intervention itself is designed to be scalable as  
24 the planning and implementation of the intervention was executed in partnership with  
25 the Ministry of Health and district health officials, including operating through  
26 government PHCs. Findings from this study could have important policy implications  
27 for CHW-led iCCM scale up across sub-Saharan Africa.  
28  
29  
30  
31  
32  
33  
34  
35  
36  
37  
38  
39  
40  
41  
42

### 43 **Limitations**

44  
45 The large geographic area and three-year time frame leave the study open to a number  
46 of potential confounding effects. Although contingency measures have been put into  
47 place for various situations that may arise, unexpected events may occur that  
48 influence the extent to which the study can be implemented per protocol. CHWs may  
49 have avenues for interacting with each other outside the structures of the intervention  
50 which may lead to contamination. Changes to the health system or other contextual  
51 factors in the intervention area, such as drug stock-outs, health centre staff strikes,  
52  
53  
54  
55  
56  
57  
58  
59  
60

1  
2  
3 concurrent programme implementation by other actors, and political insecurity may  
4  
5 be beyond the control of the study implementers. However, close partnership with  
6  
7 national and local health authorities during study preparation will enable us to  
8  
9 proactively track these events, implement contingency steps, and/or otherwise  
10  
11 document them for later sensitivity analyses of the trial's effects.  
12  
13  
14

### 15 **Trial status**

16  
17 The household baseline survey was carried out from December 2016 to February  
18  
19 2017. Health facility improvements, CHW trainings, and provider trainings were  
20  
21 completed by December 2016. Implementation of the intervention including the  
22  
23 removal of user fees began in February 2017.  
24  
25  
26  
27  
28  
29  
30  
31  
32  
33  
34  
35  
36  
37  
38  
39  
40  
41  
42  
43  
44  
45  
46  
47  
48  
49  
50  
51  
52  
53  
54  
55  
56  
57  
58  
59  
60

## DECLARATIONS

### List of abbreviations

|              |                                          |
|--------------|------------------------------------------|
| CEA .....    | Cost-Effectiveness Analysis              |
| CHW .....    | Community Health Worker                  |
| DHS .....    | Demographic Health Survey                |
| DSMB .....   | Data Safety and Monitoring Board         |
| EMR .....    | Electronic Medical Records               |
| GPS .....    | Global Positioning System                |
| iCCM .....   | Integrated Community Case Management     |
| ICER .....   | Incremental Cost-Effectiveness Ratio     |
| ITT .....    | Intention to Treat                       |
| PHC .....    | Primary Health Centre                    |
| ProCCM ..... | Proactive Community Case Management      |
| UNICEF ..... | United Nations Children's Emergency Fund |
| WHO .....    | World Health Organization                |

### Contributors

CW, KK, BP, JXL, ET, and AJ drafted the original study protocol with input from SS, NP, SB, and MF. MF conducted the sample size calculations. CW and ET prepared the protocol manuscript. All authors reviewed and provided feedback on the final version of the manuscript.

### Acknowledgements

We are grateful to Djoumé Diakité, Youssouf Keita, Yacouba Samaké, Amadou B Cissé, Aminata Konipo, and Seydou Sidibé of Muso for their role in implementing the

1  
2  
3 intervention and assuring adherence to protocol. We thank Dr. Dansiné Diarra for the  
4  
5 GPS mapping that allowed us to generate our clusters, and for providing Figure 1. We  
6  
7 thank the community-based and facility-based health workers and their supervisors  
8  
9 for their role in implementation, We are grateful to the Malian Ministry of Health,  
10  
11 representatives from Community Health Associations at each PHC site, village  
12  
13 leaders, and the communities of the Bankass District for their collaboration.  
14  
15  
16  
17  
18

### 19 **Funding**

20  
21 The trial is funded with resources received by Muso through unrestricted funding as  
22  
23 well as dedicated research funding from Child Relief International Foundation and  
24  
25 Johnson & Johnson Foundation. Child Relief International Foundation serves as the  
26  
27 nonlegal sponsor of the trial.  
28  
29  
30  
31  
32

### 33 **Competing interests**

34  
35 CW, KK, and AJ declare grants from Child Relief International Foundation. KK and  
36  
37 AJ declare grants from USAID Development Innovation Ventures. The funders and  
38  
39 sponsor had no role in study design, and will have no role in data collection, data  
40  
41 analysis, data interpretation, or writing of future reports. All authors declare no other  
42  
43 competing interests.  
44  
45  
46  
47  
48

### 49 **Ethics approval**

50  
51 Ethics Committee of the Faculty of Medicine, Pharmacy and Dentistry, University of  
52  
53 Bamako (2016/03/CE/FMPOS).  
54  
55  
56  
57

### 58 **Provenance and peer review**



1  
2  
3 Not commissioned; externally peer reviewed.  
4  
5  
6  
7  
8  
9  
10  
11  
12  
13  
14  
15  
16  
17  
18  
19  
20  
21  
22  
23  
24  
25  
26  
27  
28  
29  
30  
31  
32  
33  
34  
35  
36  
37  
38  
39  
40  
41  
42  
43  
44  
45  
46  
47  
48  
49  
50  
51  
52  
53  
54  
55  
56  
57  
58  
59  
60

For peer review only

## Tables and Figures

Figure 1: Map of study area; colours indicate the seven health catchment areas within which the trial is being conducted

Table 1: Community Health Worker package of care, provided at the patient's doorstep (intervention arm) or at the CHW's health site (both arms)

| CHW Services                                                             | Description                                                                                                                                                                                                                                                                                                                                                                                                                                                                                                 |
|--------------------------------------------------------------------------|-------------------------------------------------------------------------------------------------------------------------------------------------------------------------------------------------------------------------------------------------------------------------------------------------------------------------------------------------------------------------------------------------------------------------------------------------------------------------------------------------------------|
| Diagnosis and treatment of malaria, all ages <sup>δ</sup>                | - Diagnosis and treatment of simple cases of malaria for patients of all ages, and accompaniment of patients of all ages with severe malaria to public PHC                                                                                                                                                                                                                                                                                                                                                  |
| iCCM of common childhood illnesses <sup>δ</sup>                          | - Diagnosis and treatment of malaria, diarrhoeal disease, and acute respiratory infection for children 2-59 months, and acute moderate malnutrition for children 6 to 59 months according to standard iCCM protocols[28]                                                                                                                                                                                                                                                                                    |
| Detection of pregnancy                                                   | - Pregnancy testing for women whose last menstrual period occurred more than six weeks before the date of the visit                                                                                                                                                                                                                                                                                                                                                                                         |
| Family planning services <sup>δ</sup>                                    | - Contraceptive counselling, administration (oral contraceptives, depo provera, condoms), or referral (IUD, implants, sterilisation) for women who test negative for pregnancy and women or men who request family planning                                                                                                                                                                                                                                                                                 |
| Accompaniment or referral to PHC for danger signs, all ages <sup>δ</sup> | - Screening of sick patients of all ages for a list of predefined danger signs that indicate either immediate accompaniment or referral to public PHC<br>- Referral of pregnant women to public PHC for prenatal consultation, facility-based delivery, and post-natal care                                                                                                                                                                                                                                 |
| Follow-up care                                                           | - 24-hour follow-up for patients of all ages after referral to public PHC<br>- 24, 48 and 72 hour follow-up after treatment of malaria (all ages) or iCCM (children under five); additional follow-up according to standard iCCM protocols[28]<br>- Follow-up and danger sign monitoring throughout pregnancy (two weeks throughout her pregnancy, and every week in the final month until delivery) and post-partum period (24 hours, 48 hours, five days, and once per week until 48 days after delivery) |
| Newborn assessment <sup>δ</sup>                                          | - Conduct of newborn assessment to provide counselling and screen for danger signs at 24 hours, 48 hours, 120 hours, 7 days, 14 days, 21 days, and 28 days                                                                                                                                                                                                                                                                                                                                                  |
| Health promotion and disease prevention <sup>δ</sup>                     | - Counselling for patients and families for disease prevention using behaviour change communication techniques                                                                                                                                                                                                                                                                                                                                                                                              |

*Notes:*

<sup>δ</sup>These services are also offered by conventional CHWs in the Malian context, according to the Ministry of Health's policy on CHW care.

Abbreviations: iCCM=integrated Community Case Management; IUD=intrauterine device; PHC=primary health centre.

## REFERENCES

- 1 Chou VB, Friberg IK, Christian M, *et al.* Expanding the population coverage of evidence-based interventions with community health workers to save the lives of mothers and children: an analysis of potential global impact using the Lives Saved Tool (LiST). *J Glob Health*;7. doi:10.7189/jogh.07.020401
- 2 Young M, Wolfheim C, Marsh DR, *et al.* World Health Organization/United Nations Children's Fund joint statement on integrated community case management: an equity-focused strategy to improve access to essential treatment services for children. *Am J Trop Med Hyg* 2012;**87**:6–10. doi:10.4269/ajtmh.2012.12-0221
- 3 Das JK, Lassi ZS, Salam RA, *et al.* Effect of community based interventions on childhood diarrhea and pneumonia: uptake of treatment modalities and impact on mortality. *BMC Public Health* 2013;**13**:S29. doi:10.1186/1471-2458-13-S3-S29
- 4 Kalyango JN, Alfven T, Peterson S, *et al.* Integrated community case management of malaria and pneumonia increases prompt and appropriate treatment for pneumonia symptoms in children under five years in Eastern Uganda. *Malar J* 2013;**12**:340. doi:https://dx.doi.org/10.1186/1475-2875-12-340
- 5 Mubiru D, Byabasheija R, Bwanika JB, *et al.* Evaluation of integrated community case management in eight districts of Central Uganda. *PLoS One* 2015;**10**:1–13. doi:10.1371/journal.pone.0134767
- 6 Kalyango JN, Rutebemberwa E, Karamagi C, *et al.* High Adherence to Antimalarials and Antibiotics under Integrated Community Case Management of Illness in Children Less than Five Years in Eastern Uganda. *PLoS One* 2013;**8**:1–8. doi:10.1371/journal.pone.0060481
- 7 Kidane G, Morrow RH. Teaching mothers to provide home treatment of malaria in Tigray, Ethiopia: a randomised trial. *Lancet (London, England)* 2000;**356**:550–5. doi:10.1016/S0140-6736(00)02580-0
- 8 Munos MK, Walker CLF, Black RE. The effect of oral rehydration solution and recommended home fluids on diarrhoea mortality. *Int J Epidemiol* 2010;**39** **Suppl 1**:i75-87. doi:10.1093/ije/dyq025
- 9 Walker CLF, Black RE. Zinc for the treatment of diarrhoea: effect on diarrhoea morbidity, mortality and incidence of future episodes. *Int J Epidemiol* 2010;**39** **Suppl 1**:i63-9. doi:10.1093/ije/dyq023
- 10 Sazawal S, Black RE. Effect of pneumonia case management on mortality in neonates, infants, and preschool children: a meta-analysis of community-based trials. *Lancet Infect Dis* 2003;**3**:547–56. <http://www.ncbi.nlm.nih.gov/pubmed/12954560> (accessed 8 Mar 2016).
- 11 Theodoratou E, Al-Jilaihawi S, Woodward F, *et al.* The effect of case management on childhood pneumonia mortality in developing countries. *Int J Epidemiol* 2010;**39** **Suppl 1**:i155-71. doi:10.1093/ije/dyq032
- 12 Rasanathan K, Muñiz M, Bakshi S, *et al.* Community case management of childhood illness in sub-Saharan Africa - findings from a cross-sectional survey on policy and implementation. *J Glob Health* 2014;**4**:020401.

- 1  
2  
3 doi:10.7189/jogh.04.020401  
4  
5 13 Boschi-Pinto C, Labadie G, Dilip TR, *et al.* Global implementation survey of  
6 Integrated Management of Childhood Illness (IMCI): 20 years on. *BMJ Open*  
7 2018;**8**:1–9. doi:10.1136/bmjopen-2017-019079  
8  
9 14 Druetz T, Siekmans K, Goossens S, *et al.* The community case management of  
10 pneumonia in Africa: a review of the evidence. *Health Policy Plan*  
11 2015;**30**:253–66. doi:10.1093/heapol/czt104  
12  
13 15 Rutebemberwa E, Kadobera D, Katureebe S, *et al.* Use of community health  
14 workers for management of malaria and pneumonia in urban and rural areas in  
15 eastern Uganda. *Am J Trop Med Hyg* 2012;**87**:30–5.  
16 doi:10.4269/ajtmh.2012.11-0732  
17  
18 16 Druetz T, Ridde V, Kouanda S, *et al.* Utilization of community health workers  
19 for malaria treatment: results from a three-year panel study in the districts of  
20 Kaya and Zorgho, Burkina Faso. *Malar J* 2015;**14**:71. doi:10.1186/s12936-  
21 015-0591-9  
22  
23 17 Boone P, Elbourne D, Fazio I, *et al.* Effects of community health  
24 interventions on under-5 mortality in rural Guinea-Bissau (EPICS): a cluster-  
25 randomised controlled trial. *Lancet Glob Heal* 2016;**4**:e328–35.  
26 doi:10.1016/s2214-109x(16)30048-1  
27  
28 18 Mukanga D, Tiono AB, Anyorigiya T, *et al.* Integrated community case  
29 management of fever in children under five using rapid diagnostic tests and  
30 respiratory rate counting: A multi-country cluster randomized trial. *Am J Trop*  
31 *Med Hyg* 2012;**87**:21–9. doi:10.4269/ajtmh.2012.11-0816  
32  
33 19 Yansaneh AI, Moulton LH, George AS, *et al.* Influence of community health  
34 volunteers on care seeking and treatment coverage for common childhood  
35 illnesses in the context of free health care in rural Sierra Leone. *Trop Med Int*  
36 *Heal* 2014;**19**:1466–76. doi:10.1111/tmi.12383  
37  
38 20 Amouzou a., Hazel E, Shaw B, *et al.* Effects of the integrated Community  
39 Case Management of Childhood Illness Strategy on Child Mortality in  
40 Ethiopia: A Cluster Randomized Trial. *Am J Trop Med Hyg* 2016;**94**:596–604.  
41 doi:10.4269/ajtmh.15-0586  
42  
43 21 Amouzou a., Kanyuka M, Hazel E, *et al.* Independent Evaluation of the  
44 integrated Community Case Management of Childhood Illness Strategy in  
45 Malawi Using a National Evaluation Platform Design. *Am J Trop Med Hyg*  
46 2016;**94**:574–83. doi:10.4269/ajtmh.15-0584  
47  
48 22 Munos M, Guiella G, Robertson T, *et al.* The independent evaluation of the  
49 Rapid Scale-Up program to reduce under-five mortality in Burkina Faso.  
50 *Submitt Publ* 2015;**94**:584–95. doi:10.4269/ajtmh.15-0585  
51  
52 23 Hazel E, Bryce J. On Bathwater, Babies, and Designing Programs for Impact:  
53 Evaluations of the Integrated Community Case Management Strategy in  
54 Burkina Faso, Ethiopia, and Malawi. *Am J Trop Med Hyg* 2016;**94**:568–70.  
55 doi:10.4269/ajtmh.94-3intro1  
56  
57 24 Colvin CJ, Smith HJ, Swartz A, *et al.* Understanding careseeking for child  
58 illness in sub-Saharan Africa: A systematic review and conceptual framework  
59 based on qualitative research of household recognition and response to child  
60 diarrhoea, pneumonia and malaria. *Soc Sci Med* 2013;**86**:66–78.

- 1  
2  
3 doi:10.1016/j.socscimed.2013.02.031  
4  
5 25 Johnson A, Goss A, Beckerman J, *et al.* Hidden costs: the direct and indirect  
6 impact of user fees on access to malaria treatment and primary care in Mali.  
7 *Soc Sci Med* 2012;**75**:1786–92. doi:10.1016/j.socscimed.2012.07.015  
8  
9 26 District Sanitaire de Bankass Ministère de l'Hygiène et Santé Publique.  
10 Microplanification des Associations de Santé Communautaire. 2016.  
11  
12 27 Ministère de la Santé et l'Hygiène Publique. Plan Stratégique National des  
13 Soins Essentiels dans la Communauté. 2014.  
14  
15 28 Who/Unicef. WHO / UNICEF JOINT STATEMENT Integrated Community  
16 Case Management: An equity-focused strategy to improve access to essential  
17 treatment services for children. *United Nations Child Fund*  
18 2012;:8.[http://www.unicef.org/health/files/iCCM\\_Joint\\_Statement\\_2012.pdf](http://www.unicef.org/health/files/iCCM_Joint_Statement_2012.pdf)  
19  
20 29 Cellule de Planification et de Statistique de Mali, Institut National de la  
21 Statistique de Mali, Centre d'Études et d'Information Statistique de Mali, *et al.*  
22 Mali Enquête Démographique et de Santé (EDSM V) 2012-2013. Rockville,  
23 Maryland, USA: 2014. <http://dhsprogram.com/pubs/pdf/FR286/FR286.pdf>  
24  
25 30 Meremikwu MM, Donegan S, Sinclair D, *et al.* Intermittent preventive  
26 treatment for malaria in children living in areas with seasonal transmission.  
27 *Cochrane Database Syst Rev* 2012;:CD003756.  
28 doi:10.1002/14651858.CD003756.pub4  
29  
30 31 Hayes RJ, Moulton LH. *Cluster Randomised Trials, Second Edition*. 2 edition.  
31 Boca Raton: : Chapman and Hall/CRC 2017.  
32  
33 32 Maiga OM, Kayentao K, Traoré BT, *et al.* Superiority of 3 Over 2 Doses of  
34 Intermittent Preventive Treatment With Sulfadoxine-Pyrimethamine for the  
35 Prevention of Malaria During Pregnancy in Mali: A Randomized Controlled  
36 Trial. *Clin Infect Dis* 2011;**53**:215–23. doi:10.1093/cid/cir374  
37  
38 33 Kayentao K, Kodio M, Newman RD, *et al.* Comparison of Intermittent  
39 Preventive Treatment with Chemoprophylaxis for the Prevention of Malaria  
40 during Pregnancy in Mali. *J Infect Dis* 2005;**191**:109–16. doi:10.1086/426400  
41  
42 34 Demographic T, Program HS. Guide to DHS Statistics.  
43  
44 35 Haybittle JL. Repeated assessment of results in clinical trials of cancer  
45 treatment. *Br J Radiol* 1971;**44**:793–7. doi:10.1259/0007-1285-44-526-793  
46  
47 36 Peto R, Pike MC, Armitage P, *et al.* Design and analysis of randomized clinical  
48 trials requiring prolonged observation of each patient. II. analysis and  
49 examples. *Br J Cancer* 1977;**35**:1–  
50 39.<http://www.ncbi.nlm.nih.gov/pubmed/831755> (accessed 31 Aug 2018).  
51  
52  
53  
54  
55  
56  
57  
58  
59  
60

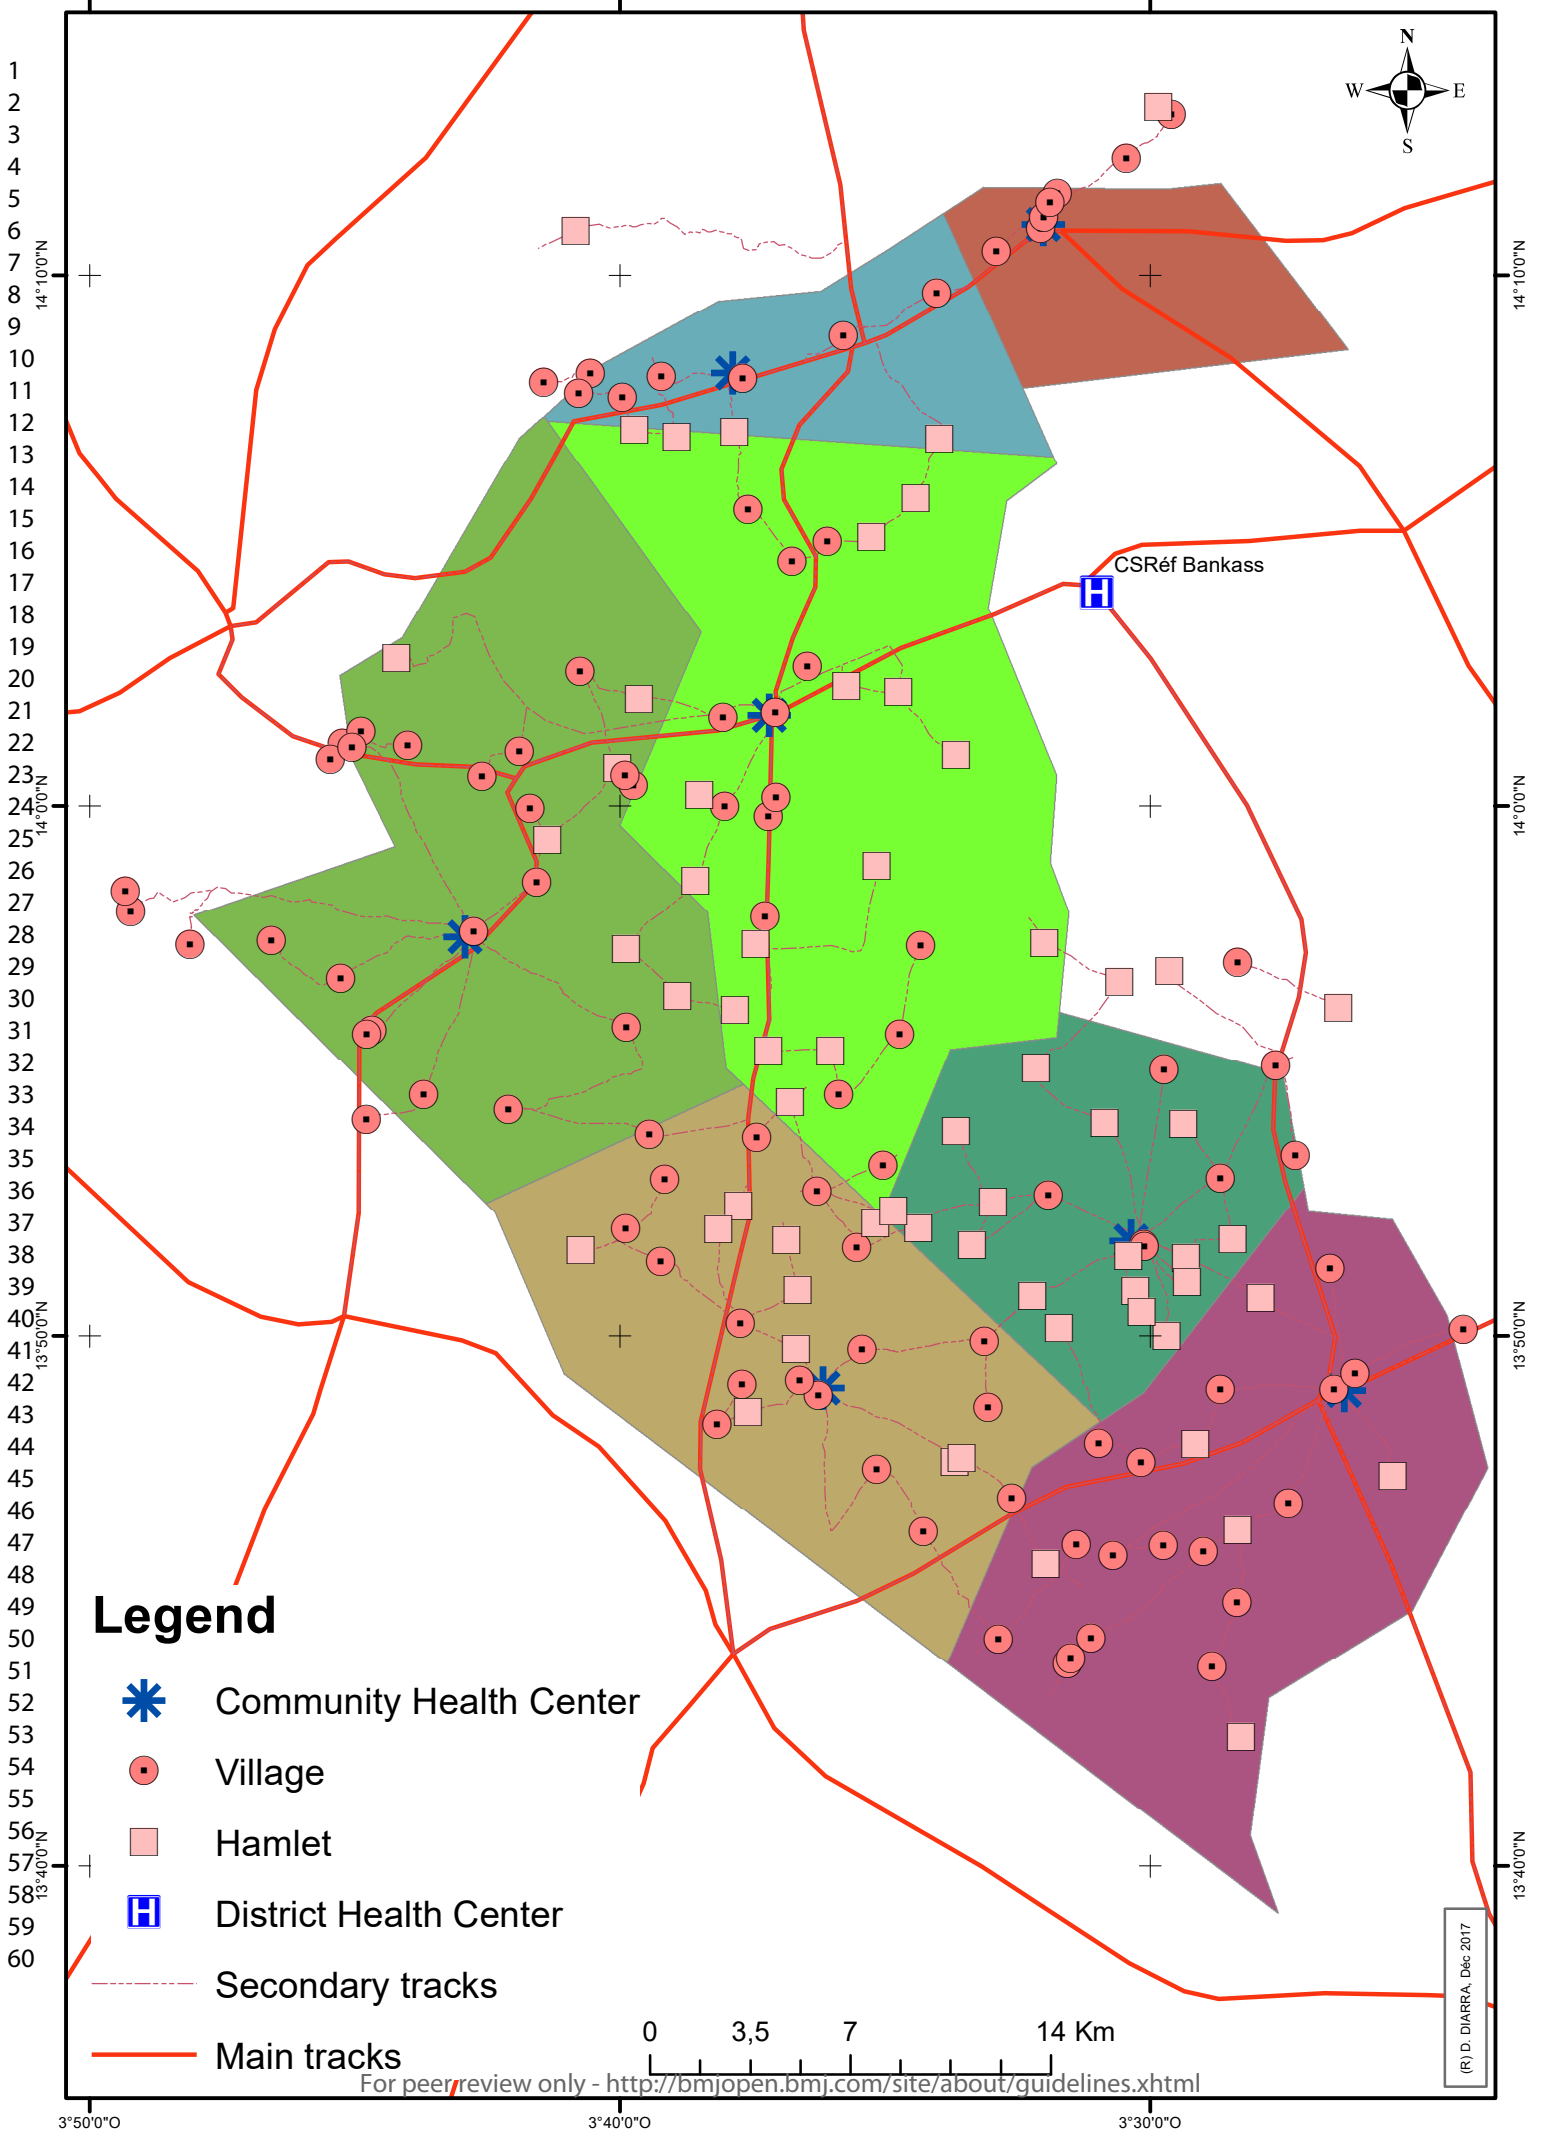

### Legend

-  Community Health Center
-  Village
-  Hamlet
-  District Health Center
-  Secondary tracks
-  Main tracks

0 3,5 7 14 Km

(R) D. DIARRA, Dec 2017

## Online Supplementary Document

### Description of the intervention

#### *Reinforcement of facility-based care*

Prior to the commencement of the trial, all clusters will receive a health system strengthening intervention implemented at all seven study PHCs. To meet anticipated increase in utilisation as a result of the trial, each PHC will receive targeted, physical infrastructure improvements, including having separate general and maternity units, separate observation rooms for men and women, a pharmacy, and solar panels for continuous electricity. All PHC staff from the seven participating sites will receive training in priority areas of clinical care, including integrated management of childhood illness according to WHO guidelines, antenatal and delivery care, post-natal and newborn care, family planning, and rational prescription. Each PHC will recruit a formally-trained midwife to complement the existing auxiliary midwives that were responsible for PHC maternity care prior to the study.

#### *CHW recruitment*

CHWs will be recruited from the cluster in which they will work. They must be between 18 to 45 years old, inclusive, and know how to read and write in French. Female candidates will be encouraged. Community leaders, including mayors, village chiefs, and members of the Community Health Association (the administrative body of the PHC) will nominate potential candidates who meet these criteria. If community leaders are unable to identify an eligible candidate from the cluster, a CHW from a nearby village will be recruited and will relocate to the cluster in which he/she will work.

1  
2  
3 CHW candidates will participate in the pre-service training (described below) after which the  
4  
5 final selection of CHWs will be made based on the trainer's evaluation of each candidate's  
6  
7 mastery of the protocol, active listening ability, spirit of commitment, and communication skills.  
8  
9  
10 CHWs who previously worked in the study area will be recruited and retrained according to their  
11  
12 randomised assignment. In both arms, the community leaders of the cluster will ensure that the  
13  
14 selected CHW(s) has a health post, which will be located either at the CHW's home or at a  
15  
16 separate site, depending on the resources and preferences of the community.  
17  
18  
19  
20

### 21 *CHW training*

22  
23 All selected CHWs will undergo a six-week, full time pre-service training and a one-week full  
24  
25 time annual reinforcement training, conducted separately by arm. Training curriculum for the  
26  
27 following will be the same for both arms: iCCM of malaria, diarrhoea, acute respiratory  
28  
29 infections, and malnutrition; newborn care; antenatal and post-partum care; contraception;  
30  
31 vaccination schedules; CHW roles and responsibilities, including patient communication, good  
32  
33 clinical practices, and stock management; and data collection on a phone-based CHW  
34  
35 application. In the intervention arm, the training curriculum will include additional modules on  
36  
37 proactive case detection, door-step care, and home-based follow-up.  
38  
39  
40  
41  
42  
43

### 44 *CHW supervision*

45  
46 All participating CHWs will receive monthly one-on-one supervision and weekly group  
47  
48 supervision with a dedicated CHW supervisor, recruited and trained for this exclusive purpose.  
49  
50 Each supervisor will be responsible for between 15 and 20 CHWs, with an equal number of  
51  
52 CHWs from intervention and control arms. In turn, CHW supervisors themselves will receive  
53  
54  
55  
56  
57  
58  
59  
60



1  
2  
3 monthly one-on-one supervision and weekly group supervision from a manager, following the  
4 same strategy used for CHW supervision.  
5  
6  
7  
8  
9

10 Group supervision sessions will be held separately for CHWs assigned to each study arm in  
11 order to minimize spill-over effects. Group supervision sessions will be held every week for the  
12 first three months after intervention launch and every two weeks after the first three months.  
13  
14 During group supervision sessions, which will last approximately two hours, the supervisor and  
15 CHWs will discuss common challenges faced by CHWs in the field and potential solutions. At  
16 the final group session of the calendar month, the supervisor and CHWs will agree on a schedule  
17 of individual supervision sessions for the coming month. Each CHW will know in advance the  
18 date and time of his/her next individual supervision session, but not the location within his/her  
19 catchment area at which it will take place.  
20  
21  
22  
23  
24  
25  
26  
27  
28  
29  
30  
31  
32

33 Monthly individual CHW supervision activities will include the following: (i) home visits  
34 conducted without the CHW in which the supervisor conducts household interviews in the  
35 absence of the CHW to elicit patient or caregiver perspectives of CHW care; (ii) direct  
36 observation in which the supervisor observes the CHW providing care (at the health post for  
37 CHWs in the control arm, during home visits for CHWs in the intervention arm); and (iii) one-  
38 on-one feedback in which the supervisor and CHW identify areas of strength and areas for  
39 improvement.  
40  
41  
42  
43  
44  
45  
46  
47  
48  
49  
50

51 *CHW reporting*  
52  
53  
54  
55  
56  
57  
58  
59  
60

1  
2  
3 CHWs will record all patient encounters using a CHW mobile application on an Android  
4  
5 smartphone. In addition to measuring aggregate process indicators, such as the number of  
6  
7 children under five evaluated per month, the data collected by the CHW application will be used  
8  
9 to generate CHW performance indicators, including coverage (percentage of population  
10  
11 interfacing with the CHW per month), speed (percentage of sick children under five treated  
12  
13 within one day of symptom onset), and quality of care (percentage of patient encounters  
14  
15 conducted without protocol error). The data collected by the CHW application will also be used  
16  
17 to identify system-level challenges, such as drug stock-outs.  
18  
19  
20  
21  
22  
23

24 CHWs who commit any protocol deviation (e.g., conducting proactive case finding home visits  
25  
26 in the control arm, not conducting proactive case finding home visits in the intervention arm),  
27  
28 will be required first to work closely with the supervisor to address the problem, and then will be  
29  
30 summoned to a meeting with the administrative body of the PHC if the problem persists, and  
31  
32 finally removed from his/her post if performance does not improve. Falsification of data or  
33  
34 charging user fees to patients (verified through supervisory home visits without the CHW and/or  
35  
36 patient data auditing) will constitute immediate termination.  
37  
38  
39  
40  
41

#### 42 *CHW compensation*

43  
44 All CHWs will be compensated for their work with a monthly salary of 40,000 FCFA  
45  
46 (approximately 70 USD), which is circa minimum wage. CHWs will receive an additional 3000  
47  
48 FCFA (approximately 5.40 USD) of monthly phone credit, and 1000 FCFA (approximately 1.80  
49  
50 USD) for each group supervision meeting to cover transportation costs. All CHWs will also be  
51  
52  
53  
54  
55  
56  
57  
58  
59  
60

1  
2  
3 enrolled in Mali's payroll tax and social security retirement benefits (INPS) system.  
4

5 Compensation will be the same in both study arms.  
6  
7  
8  
9  
10  
11  
12  
13  
14  
15  
16  
17  
18  
19  
20  
21  
22  
23  
24  
25  
26  
27  
28  
29  
30  
31  
32  
33  
34  
35  
36  
37  
38  
39  
40  
41  
42  
43  
44  
45  
46  
47  
48  
49  
50  
51  
52  
53  
54  
55  
56  
57  
58  
59  
60

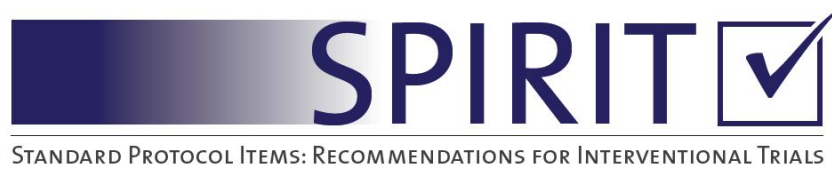

SPIRIT 2013 Checklist: Recommended items to address in a clinical trial protocol and related documents\*

| Section/item                      | Item No | Description                                                                                                                                                                                                                                                                              | Page No                                                                                               |
|-----------------------------------|---------|------------------------------------------------------------------------------------------------------------------------------------------------------------------------------------------------------------------------------------------------------------------------------------------|-------------------------------------------------------------------------------------------------------|
| <b>Administrative information</b> |         |                                                                                                                                                                                                                                                                                          |                                                                                                       |
| Title                             | 1       | Descriptive title identifying the study design, population, interventions, and, if applicable, trial acronym                                                                                                                                                                             | 1                                                                                                     |
| Trial registration                | 2a      | Trial identifier and registry name. If not yet registered, name of intended registry                                                                                                                                                                                                     | 3                                                                                                     |
|                                   | 2b      | All items from the World Health Organization Trial Registration Data Set                                                                                                                                                                                                                 | <a href="https://clinicaltrials.gov/show/NCT02694055">https://clinicaltrials.gov/show/NCT02694055</a> |
| Protocol version                  | 3       | Date and version identifier                                                                                                                                                                                                                                                              | Document name                                                                                         |
| Funding                           | 4       | Sources and types of financial, material, and other support                                                                                                                                                                                                                              | 23                                                                                                    |
| Roles and responsibilities        | 5a      | Names, affiliations, and roles of protocol contributors                                                                                                                                                                                                                                  | 22                                                                                                    |
|                                   | 5b      | Name and contact information for the trial sponsor                                                                                                                                                                                                                                       | 23                                                                                                    |
|                                   | 5c      | Role of study sponsor and funders, if any, in study design; collection, management, analysis, and interpretation of data; writing of the report; and the decision to submit the report for publication, including whether they will have ultimate authority over any of these activities | 23                                                                                                    |
|                                   | 5d      | Composition, roles, and responsibilities of the coordinating centre, steering committee, endpoint adjudication committee, data management team, and other individuals or groups overseeing the trial, if applicable (see Item 21a for data monitoring committee)                         | 18-19                                                                                                 |

**Introduction**

|    |                                                           |     |                                                          |
|----|-----------------------------------------------------------|-----|----------------------------------------------------------|
| 1  |                                                           |     |                                                          |
| 2  | Background and                                            | 6a  | Description of research question and justification for   |
| 3  | rationale                                                 |     | undertaking the trial, including summary of relevant     |
| 4  |                                                           |     | studies (published and unpublished) examining            |
| 5  |                                                           |     | benefits and harms for each intervention                 |
| 6  |                                                           |     |                                                          |
| 7  |                                                           | 6b  | Explanation for choice of comparators                    |
| 8  |                                                           |     |                                                          |
| 9  | Objectives                                                | 7   | Specific objectives or hypotheses                        |
| 10 |                                                           |     |                                                          |
| 11 | Trial design                                              | 8   | Description of trial design including type of trial (eg, |
| 12 |                                                           |     | parallel group, crossover, factorial, single group),     |
| 13 |                                                           |     | allocation ratio, and framework (eg, superiority,        |
| 14 |                                                           |     | equivalence, noninferiority, exploratory)                |
| 15 |                                                           |     |                                                          |
| 16 |                                                           |     |                                                          |
| 17 |                                                           |     |                                                          |
| 18 | <b>Methods: Participants, interventions, and outcomes</b> |     |                                                          |
| 19 | Study setting                                             | 9   | Description of study settings (eg, community clinic,     |
| 20 |                                                           |     | academic hospital) and list of countries where data      |
| 21 |                                                           |     | will be collected. Reference to where list of study      |
| 22 |                                                           |     | sites can be obtained                                    |
| 23 |                                                           |     |                                                          |
| 24 |                                                           |     |                                                          |
| 25 | Eligibility criteria                                      | 10  | Inclusion and exclusion criteria for participants. If    |
| 26 |                                                           |     | applicable, eligibility criteria for study centres and   |
| 27 |                                                           |     | individuals who will perform the interventions (eg,      |
| 28 |                                                           |     | surgeons, psychotherapists)                              |
| 29 |                                                           |     |                                                          |
| 30 |                                                           |     |                                                          |
| 31 |                                                           |     |                                                          |
| 32 | Interventions                                             | 11a | Interventions for each group with sufficient detail to   |
| 33 |                                                           |     | allow replication, including how and when they will      |
| 34 |                                                           |     | be administered                                          |
| 35 |                                                           |     |                                                          |
| 36 |                                                           |     |                                                          |
| 37 |                                                           | 11b | Criteria for discontinuing or modifying allocated        |
| 38 |                                                           |     | interventions for a given trial participant (eg, drug    |
| 39 |                                                           |     | dose change in response to harms, participant            |
| 40 |                                                           |     | request, or improving/worsening disease)                 |
| 41 |                                                           |     |                                                          |
| 42 |                                                           | 11c | Strategies to improve adherence to intervention          |
| 43 |                                                           |     | protocols, and any procedures for monitoring             |
| 44 |                                                           |     | adherence (eg, drug tablet return, laboratory tests)     |
| 45 |                                                           |     |                                                          |
| 46 |                                                           |     |                                                          |
| 47 |                                                           | 11d | Relevant concomitant care and interventions that         |
| 48 |                                                           |     | are permitted or prohibited during the trial             |
| 49 |                                                           |     |                                                          |
| 50 |                                                           |     |                                                          |
| 51 |                                                           |     |                                                          |
| 52 |                                                           |     |                                                          |
| 53 |                                                           |     |                                                          |
| 54 |                                                           |     |                                                          |
| 55 |                                                           |     |                                                          |
| 56 |                                                           |     |                                                          |
| 57 |                                                           |     |                                                          |
| 58 |                                                           |     |                                                          |
| 59 |                                                           |     |                                                          |
| 60 |                                                           |     |                                                          |

|    |                      |    |                                                                                                                                                                                                                                                                                                                                                                                |                     |
|----|----------------------|----|--------------------------------------------------------------------------------------------------------------------------------------------------------------------------------------------------------------------------------------------------------------------------------------------------------------------------------------------------------------------------------|---------------------|
| 1  |                      |    |                                                                                                                                                                                                                                                                                                                                                                                |                     |
| 2  | Outcomes             | 12 | Primary, secondary, and other outcomes, including the specific measurement variable (eg, systolic blood pressure), analysis metric (eg, change from baseline, final value, time to event), method of aggregation (eg, median, proportion), and time point for each outcome. Explanation of the clinical relevance of chosen efficacy and harm outcomes is strongly recommended | 10-11               |
| 3  |                      |    |                                                                                                                                                                                                                                                                                                                                                                                |                     |
| 4  |                      |    |                                                                                                                                                                                                                                                                                                                                                                                |                     |
| 5  |                      |    |                                                                                                                                                                                                                                                                                                                                                                                |                     |
| 6  |                      |    |                                                                                                                                                                                                                                                                                                                                                                                |                     |
| 7  |                      |    |                                                                                                                                                                                                                                                                                                                                                                                |                     |
| 8  |                      |    |                                                                                                                                                                                                                                                                                                                                                                                |                     |
| 9  |                      |    |                                                                                                                                                                                                                                                                                                                                                                                |                     |
| 10 |                      |    |                                                                                                                                                                                                                                                                                                                                                                                |                     |
| 11 |                      |    |                                                                                                                                                                                                                                                                                                                                                                                |                     |
| 12 | Participant timeline | 13 | Time schedule of enrolment, interventions (including any run-ins and washouts), assessments, and visits for participants. A schematic diagram is highly recommended (see Figure)                                                                                                                                                                                               | 21 for trial status |
| 13 |                      |    |                                                                                                                                                                                                                                                                                                                                                                                |                     |
| 14 |                      |    |                                                                                                                                                                                                                                                                                                                                                                                |                     |
| 15 |                      |    |                                                                                                                                                                                                                                                                                                                                                                                |                     |
| 16 |                      |    |                                                                                                                                                                                                                                                                                                                                                                                |                     |
| 17 |                      |    |                                                                                                                                                                                                                                                                                                                                                                                |                     |
| 18 | Sample size          | 14 | Estimated number of participants needed to achieve study objectives and how it was determined, including clinical and statistical assumptions supporting any sample size calculations                                                                                                                                                                                          | 10                  |
| 19 |                      |    |                                                                                                                                                                                                                                                                                                                                                                                |                     |
| 20 |                      |    |                                                                                                                                                                                                                                                                                                                                                                                |                     |
| 21 |                      |    |                                                                                                                                                                                                                                                                                                                                                                                |                     |
| 22 |                      |    |                                                                                                                                                                                                                                                                                                                                                                                |                     |
| 23 |                      |    |                                                                                                                                                                                                                                                                                                                                                                                |                     |
| 24 | Recruitment          | 15 | Strategies for achieving adequate participant enrolment to reach target sample size                                                                                                                                                                                                                                                                                            | 12                  |
| 25 |                      |    |                                                                                                                                                                                                                                                                                                                                                                                |                     |
| 26 |                      |    |                                                                                                                                                                                                                                                                                                                                                                                |                     |

### Methods: Assignment of interventions (for controlled trials)

#### Allocation:

|    |                                  |     |                                                                                                                                                                                                                                                                                                                                                          |    |
|----|----------------------------------|-----|----------------------------------------------------------------------------------------------------------------------------------------------------------------------------------------------------------------------------------------------------------------------------------------------------------------------------------------------------------|----|
| 31 | Sequence generation              | 16a | Method of generating the allocation sequence (eg, computer-generated random numbers), and list of any factors for stratification. To reduce predictability of a random sequence, details of any planned restriction (eg, blocking) should be provided in a separate document that is unavailable to those who enrol participants or assign interventions | 9  |
| 32 |                                  |     |                                                                                                                                                                                                                                                                                                                                                          |    |
| 33 |                                  |     |                                                                                                                                                                                                                                                                                                                                                          |    |
| 34 |                                  |     |                                                                                                                                                                                                                                                                                                                                                          |    |
| 35 |                                  |     |                                                                                                                                                                                                                                                                                                                                                          |    |
| 36 |                                  |     |                                                                                                                                                                                                                                                                                                                                                          |    |
| 37 |                                  |     |                                                                                                                                                                                                                                                                                                                                                          |    |
| 38 |                                  |     |                                                                                                                                                                                                                                                                                                                                                          |    |
| 39 |                                  |     |                                                                                                                                                                                                                                                                                                                                                          |    |
| 40 | Allocation concealment mechanism | 16b | Mechanism of implementing the allocation sequence (eg, central telephone; sequentially numbered, opaque, sealed envelopes), describing any steps to conceal the sequence until interventions are assigned                                                                                                                                                | NA |
| 41 |                                  |     |                                                                                                                                                                                                                                                                                                                                                          |    |
| 42 |                                  |     |                                                                                                                                                                                                                                                                                                                                                          |    |
| 43 |                                  |     |                                                                                                                                                                                                                                                                                                                                                          |    |
| 44 |                                  |     |                                                                                                                                                                                                                                                                                                                                                          |    |
| 45 |                                  |     |                                                                                                                                                                                                                                                                                                                                                          |    |
| 46 |                                  |     |                                                                                                                                                                                                                                                                                                                                                          |    |
| 47 | Implementation                   | 16c | Who will generate the allocation sequence, who will enrol participants, and who will assign participants to interventions                                                                                                                                                                                                                                | 9  |
| 48 |                                  |     |                                                                                                                                                                                                                                                                                                                                                          |    |
| 49 |                                  |     |                                                                                                                                                                                                                                                                                                                                                          |    |
| 50 |                                  |     |                                                                                                                                                                                                                                                                                                                                                          |    |
| 51 |                                  |     |                                                                                                                                                                                                                                                                                                                                                          |    |
| 52 | Blinding (masking)               | 17a | Who will be blinded after assignment to interventions (eg, trial participants, care providers, outcome assessors, data analysts), and how                                                                                                                                                                                                                | 9  |
| 53 |                                  |     |                                                                                                                                                                                                                                                                                                                                                          |    |
| 54 |                                  |     |                                                                                                                                                                                                                                                                                                                                                          |    |
| 55 |                                  |     |                                                                                                                                                                                                                                                                                                                                                          |    |
| 56 |                                  | 17b | If blinded, circumstances under which unblinding is permissible, and procedure for revealing a participant's allocated intervention during the trial                                                                                                                                                                                                     | 9  |
| 57 |                                  |     |                                                                                                                                                                                                                                                                                                                                                          |    |
| 58 |                                  |     |                                                                                                                                                                                                                                                                                                                                                          |    |
| 59 |                                  |     |                                                                                                                                                                                                                                                                                                                                                          |    |
| 60 |                                  |     |                                                                                                                                                                                                                                                                                                                                                          |    |

## Methods: Data collection, management, and analysis

|                         |     |                                                                                                                                                                                                                                                                                                                                                                                                              |                                   |
|-------------------------|-----|--------------------------------------------------------------------------------------------------------------------------------------------------------------------------------------------------------------------------------------------------------------------------------------------------------------------------------------------------------------------------------------------------------------|-----------------------------------|
| Data collection methods | 18a | Plans for assessment and collection of outcome, baseline, and other trial data, including any related processes to promote data quality (eg, duplicate measurements, training of assessors) and a description of study instruments (eg, questionnaires, laboratory tests) along with their reliability and validity, if known. Reference to where data collection forms can be found, if not in the protocol | 12-14                             |
|                         | 18b | Plans to promote participant retention and complete follow-up, including list of any outcome data to be collected for participants who discontinue or deviate from intervention protocols                                                                                                                                                                                                                    | 13                                |
| Data management         | 19  | Plans for data entry, coding, security, and storage, including any related processes to promote data quality (eg, double data entry; range checks for data values). Reference to where details of data management procedures can be found, if not in the protocol                                                                                                                                            | SOPs available upon request       |
| Statistical methods     | 20a | Statistical methods for analysing primary and secondary outcomes. Reference to where other details of the statistical analysis plan can be found, if not in the protocol                                                                                                                                                                                                                                     | 15-17, SAP available upon request |
|                         | 20b | Methods for any additional analyses (eg, subgroup and adjusted analyses)                                                                                                                                                                                                                                                                                                                                     | 15-17, SAP available upon request |
|                         | 20c | Definition of analysis population relating to protocol non-adherence (eg, as randomised analysis), and any statistical methods to handle missing data (eg, multiple imputation)                                                                                                                                                                                                                              | 15-17, SAP available upon request |

## Methods: Monitoring

|                 |     |                                                                                                                                                                                                                                                                                                                                       |                                            |
|-----------------|-----|---------------------------------------------------------------------------------------------------------------------------------------------------------------------------------------------------------------------------------------------------------------------------------------------------------------------------------------|--------------------------------------------|
| Data monitoring | 21a | Composition of data monitoring committee (DMC); summary of its role and reporting structure; statement of whether it is independent from the sponsor and competing interests; and reference to where further details about its charter can be found, if not in the protocol. Alternatively, an explanation of why a DMC is not needed | 18-19, DSMB charter available upon request |
|                 | 21b | Description of any interim analyses and stopping guidelines, including who will have access to these interim results and make the final decision to terminate the trial                                                                                                                                                               | 18-19                                      |

|    |                                 |     |                                                          |    |
|----|---------------------------------|-----|----------------------------------------------------------|----|
| 1  |                                 |     |                                                          |    |
| 2  | Harms                           | 22  | Plans for collecting, assessing, reporting, and          | 18 |
| 3  |                                 |     | managing solicited and spontaneously reported            |    |
| 4  |                                 |     | adverse events and other unintended effects of trial     |    |
| 5  |                                 |     | interventions or trial conduct                           |    |
| 6  |                                 |     |                                                          |    |
| 7  | Auditing                        | 23  | Frequency and procedures for auditing trial conduct,     | 18 |
| 8  |                                 |     | if any, and whether the process will be independent      |    |
| 9  |                                 |     | from investigators and the sponsor                       |    |
| 10 |                                 |     |                                                          |    |
| 11 |                                 |     |                                                          |    |
| 12 | <b>Ethics and dissemination</b> |     |                                                          |    |
| 13 |                                 |     |                                                          |    |
| 14 | Research ethics                 | 24  | Plans for seeking research ethics                        | 18 |
| 15 | approval                        |     | committee/institutional review board (REC/IRB)           |    |
| 16 |                                 |     | approval                                                 |    |
| 17 |                                 |     |                                                          |    |
| 18 | Protocol                        | 25  | Plans for communicating important protocol               | 18 |
| 19 | amendments                      |     | modifications (eg, changes to eligibility criteria,      |    |
| 20 |                                 |     | outcomes, analyses) to relevant parties (eg,             |    |
| 21 |                                 |     | investigators, REC/IRBs, trial participants, trial       |    |
| 22 |                                 |     | registries, journals, regulators)                        |    |
| 23 |                                 |     |                                                          |    |
| 24 |                                 |     |                                                          |    |
| 25 | Consent or assent               | 26a | Who will obtain informed consent or assent from          | 19 |
| 26 |                                 |     | potential trial participants or authorised surrogates,   |    |
| 27 |                                 |     | and how (see Item 32)                                    |    |
| 28 |                                 |     |                                                          |    |
| 29 |                                 |     |                                                          |    |
| 30 |                                 | 26b | Additional consent provisions for collection and use     | NA |
| 31 |                                 |     | of participant data and biological specimens in          |    |
| 32 |                                 |     | ancillary studies, if applicable                         |    |
| 33 |                                 |     |                                                          |    |
| 34 | Confidentiality                 | 27  | How personal information about potential and             | 19 |
| 35 |                                 |     | enrolled participants will be collected, shared, and     |    |
| 36 |                                 |     | maintained in order to protect confidentiality before,   |    |
| 37 |                                 |     | during, and after the trial                              |    |
| 38 |                                 |     |                                                          |    |
| 39 |                                 |     |                                                          |    |
| 40 | Declaration of                  | 28  | Financial and other competing interests for principal    | 23 |
| 41 | interests                       |     | investigators for the overall trial and each study site  |    |
| 42 |                                 |     |                                                          |    |
| 43 | Access to data                  | 29  | Statement of who will have access to the final trial     | 19 |
| 44 |                                 |     | dataset, and disclosure of contractual agreements        |    |
| 45 |                                 |     | that limit such access for investigators                 |    |
| 46 |                                 |     |                                                          |    |
| 47 |                                 |     |                                                          |    |
| 48 | Ancillary and                   | 30  | Provisions, if any, for ancillary and post-trial care,   | 19 |
| 49 | post-trial care                 |     | and for compensation to those who suffer harm from       |    |
| 50 |                                 |     | trial participation                                      |    |
| 51 |                                 |     |                                                          |    |
| 52 | Dissemination                   | 31a | Plans for investigators and sponsor to communicate       | 19 |
| 53 | policy                          |     | trial results to participants, healthcare professionals, |    |
| 54 |                                 |     | the public, and other relevant groups (eg, via           |    |
| 55 |                                 |     | publication, reporting in results databases, or other    |    |
| 56 |                                 |     | data sharing arrangements), including any                |    |
| 57 |                                 |     | publication restrictions                                 |    |
| 58 |                                 |     |                                                          |    |
| 59 |                                 |     |                                                          |    |
| 60 |                                 |     |                                                          |    |



|   |     |                                                       |    |
|---|-----|-------------------------------------------------------|----|
| 1 |     |                                                       |    |
| 2 | 31b | Authorship eligibility guidelines and any intended    | 19 |
| 3 |     | use of professional writers                           |    |
| 4 |     |                                                       |    |
| 5 | 31c | Plans, if any, for granting public access to the full | 19 |
| 6 |     | protocol, participant-level dataset, and statistical  |    |
| 7 |     | code                                                  |    |
| 8 |     |                                                       |    |
| 9 |     |                                                       |    |

## Appendices

|    |                  |    |                                                        |                |
|----|------------------|----|--------------------------------------------------------|----------------|
| 11 | Informed consent | 32 | Model consent form and other related                   | These are      |
| 12 | materials        |    | documentation given to participants and authorised     | available upon |
| 13 |                  |    | surrogates                                             | request        |
| 14 |                  |    |                                                        |                |
| 15 |                  |    |                                                        |                |
| 16 | Biological       | 33 | Plans for collection, laboratory evaluation, and       | NA             |
| 17 | specimens        |    | storage of biological specimens for genetic or         |                |
| 18 |                  |    | molecular analysis in the current trial and for future |                |
| 19 |                  |    | use in ancillary studies, if applicable                |                |
| 20 |                  |    |                                                        |                |

---

\*It is strongly recommended that this checklist be read in conjunction with the SPIRIT 2013 Explanation & Elaboration for important clarification on the items. Amendments to the protocol should be tracked and dated. The SPIRIT checklist is copyrighted by the SPIRIT Group under the Creative Commons "[Attribution-NonCommercial-NoDerivs 3.0 Unported](https://creativecommons.org/licenses/by-nc-nd/3.0/)" license.
